# Supplementary material
Source: publisher figshare collection journal article supplement (https://acs.figshare.com/ndownloader/files/6054597)
Supplement: Supplementary file 1 [file 6054597]

**CO<sub>2</sub>-Mediated Formation of Chiral Carbamates from *meso*-Epoxides via  
Polycarbonate Intermediates**

Ye Liu,\* Wei-Min Ren, Ke-Ke He, Wen-Zhen Zhang, Wen-Bing Li, Meng Wang, and  
Xiao-Bing Lu\*

**Supporting Information**

**Table of Content**

|                                                                                 |    |
|---------------------------------------------------------------------------------|----|
| 1. Determination of enantiomeric purity of carbamate derivatives .....          | 2  |
| 2. NMR spectrum of various carbamate derivatives .....                          | 3  |
| 3. HPLC spectrum of various carbamate derivatives .....                         | 17 |
| 4. Mechanistic understanding of ammonolysis reaction .....                      | 35 |
| 5. NMR spectrum of ( <i>S,S</i> )-carbamate derivative for X-Ray analysis ..... | 42 |
| 6. Crystal structure determination .....                                        | 43 |

### 1. Determination of enantiomeric purity of carbamate derivatives

The enantiomeric excess of *trans*-carbamate derivatives **1a-1d**, **1g**, **1h**, **1i**, **2a-2c**, **3a**, **3c**, **4a**, **4b**, **5a**, **6a** and **7a** were determined by HPLC using a chiral column, the details were listed in Table S1.

**Table S1. HPLC resolution conditions and results of racemic compounds<sup>a</sup>**

| Entry | substrate | Chiral column  | Mobile phase<br>( <sup>n</sup> Hexane/ <sup>i</sup> PrOH) | $\lambda$<br>(nm) | Retention<br>time (min) |
|-------|-----------|----------------|-----------------------------------------------------------|-------------------|-------------------------|
| 1     | <b>1a</b> | Chiralpak AD   | 95/5                                                      | 210               | 12.2/13.6               |
| 2     | <b>1b</b> | Chiralpak AD   | 95/5                                                      | 210               | 10.4/11.3               |
| 3     | <b>1c</b> | Chiralpak AD   | 90/10                                                     | 210               | 9.3/11.5                |
| 4     | <b>1d</b> | Chiralpak AD   | 95/5                                                      | 210               | 19.6/48.1               |
| 5     | <b>1g</b> | Chiralpak AD   | 90/10                                                     | 254               | 9.2/10.4                |
| 6     | <b>1h</b> | Chiralpak AD   | 90/10                                                     | 254               | 8.4/9.2                 |
| 7     | <b>1i</b> | Chiralpak AS-H | 90/10                                                     | 214               | 5.9/10.1                |
| 8     | <b>2a</b> | Chiralpak AD   | 90/10                                                     | 210               | 9.7/15.5                |
| 9     | <b>2b</b> | Chiralcel AD   | 90/10                                                     | 210               | 8.8/12.1                |
| 10    | <b>2c</b> | Chiralpak AD   | 90/10                                                     | 210               | 7.4/12.9                |
| 11    | <b>3a</b> | Chiralpak AS-H | 95/5                                                      | 210               | 8.6/10.2                |
| 12    | <b>3c</b> | Chiralpak AD   | 90/10                                                     | 210               | 13.0/15.1               |
| 13    | <b>4a</b> | Chiralpak AD   | 90/10                                                     | 210               | 7.3/14.2                |
| 14    | <b>4b</b> | Chiralpak AD   | 95/5                                                      | 210               | 22.5/30.9               |
| 15    | <b>5a</b> | Chiralpak AD   | 90/10                                                     | 210               | 8.5/10.2                |
| 16    | <b>6a</b> | Chiralpak AD   | 90/10                                                     | 254               | 12.1/15.1               |
| 17    | <b>7a</b> | Chiralpak AD   | 90/10                                                     | 210               | 9.1/12.1                |

<sup>a</sup>flow rate is 1.0 mL/min and  $\lambda$  is maximum absorption wavelength.

The determination enantiomeric excess of **1e**, **1f** and **3b** was not determined because of the low ultraviolet response in HPLC analysis

## 2. NMR spectrum of various carbamate derivatives

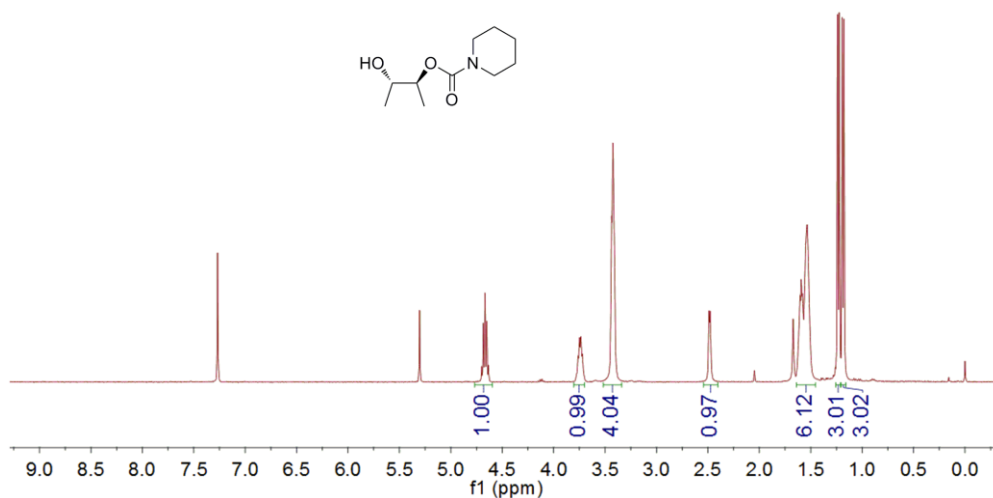

Figure S1. <sup>1</sup>H NMR spectrum of 1a

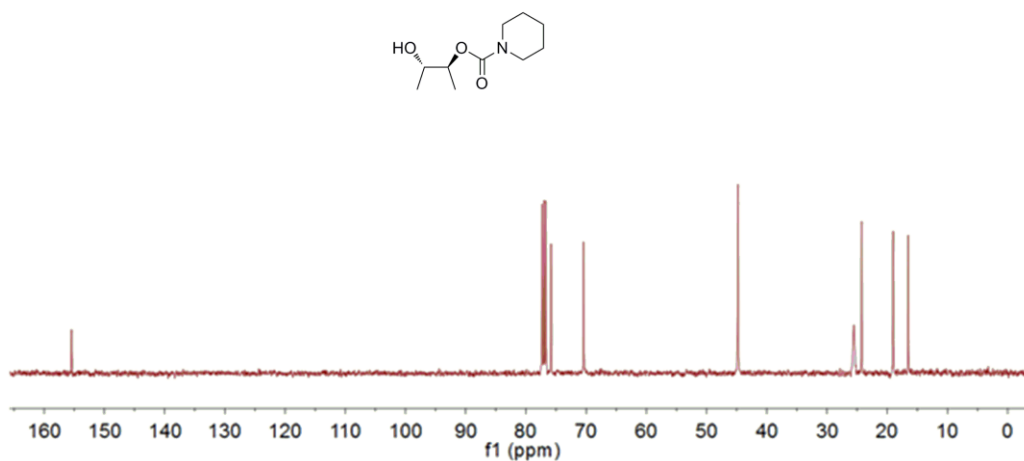

Figure S2. <sup>13</sup>C NMR spectrum of 1a

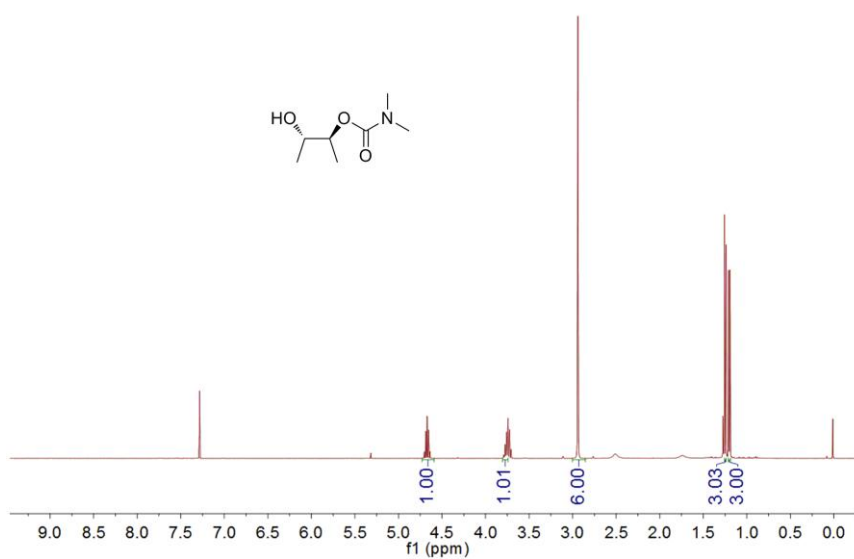

Figure S3. <sup>1</sup>H NMR spectrum of 1b

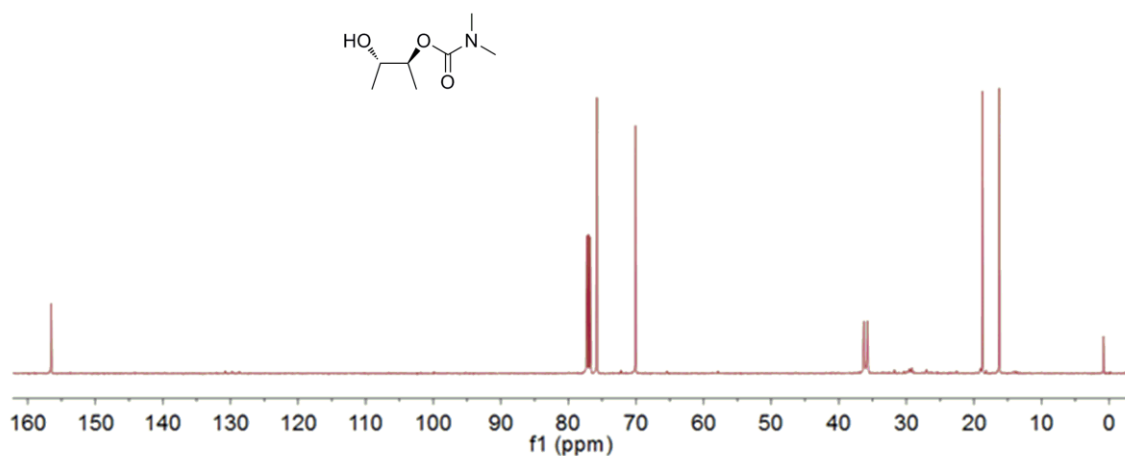

**Figure S4.** <sup>13</sup>C NMR spectrum of **1b**

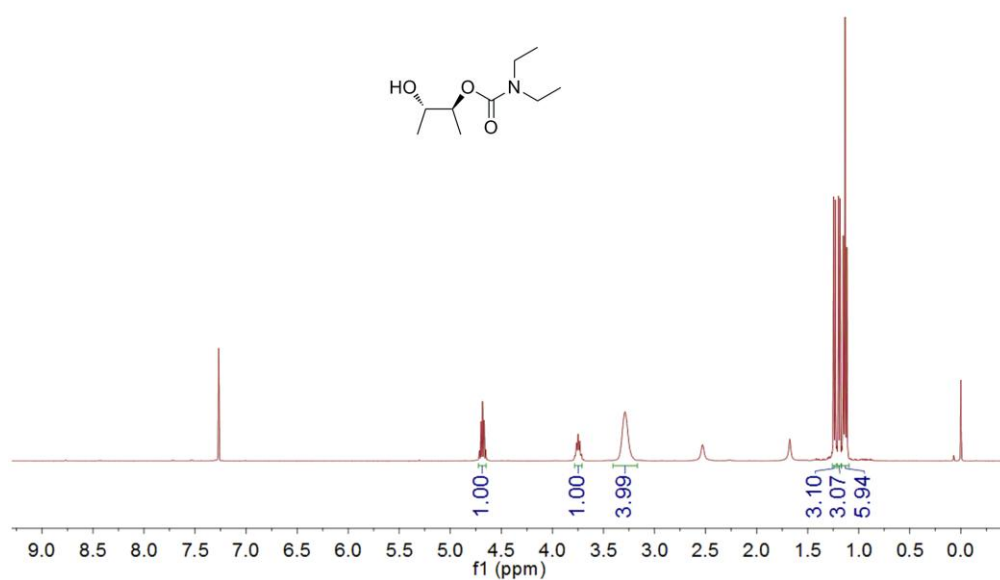

**Figure S5.** <sup>1</sup>H NMR spectrum of **1c**

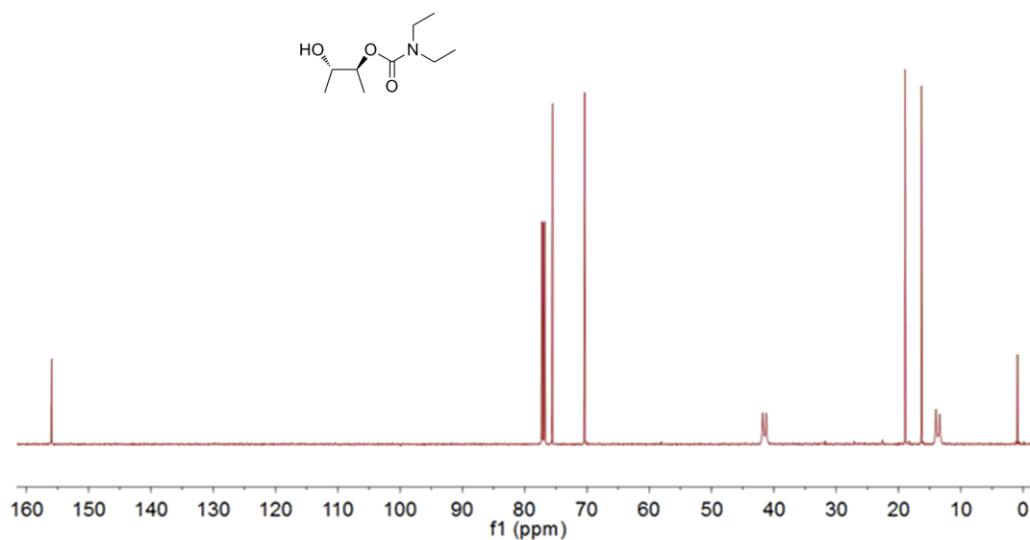

**Figure S6.** <sup>13</sup>C NMR spectrum of **1c**

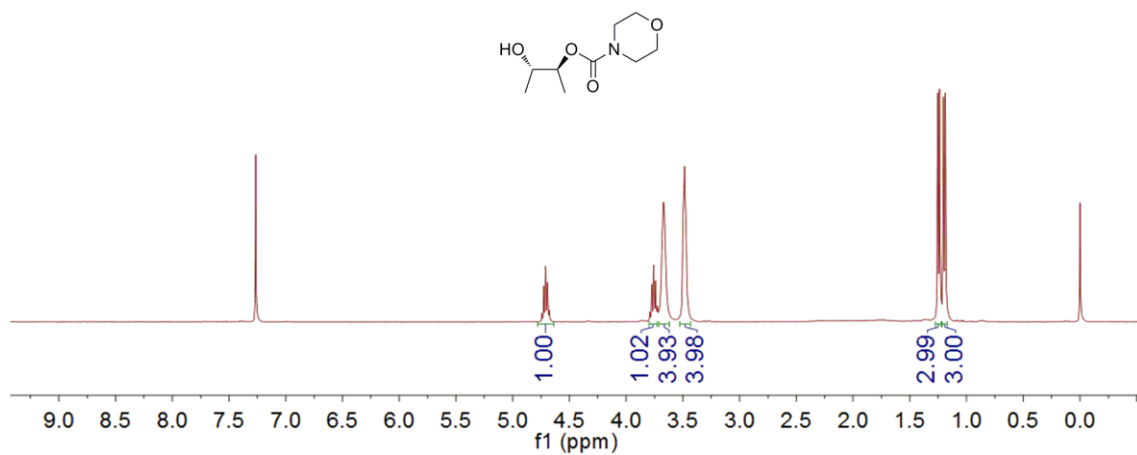

**Figure S7.** <sup>1</sup>H NMR spectrum of 1d

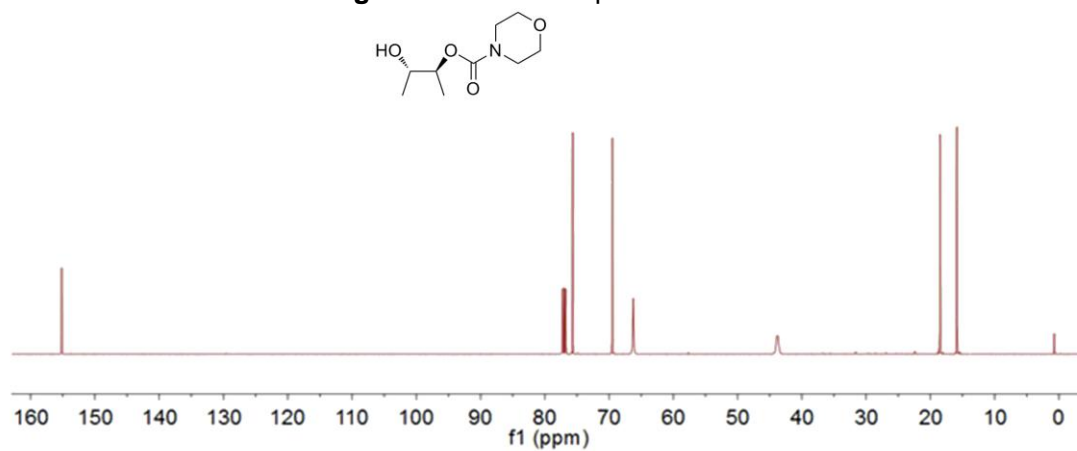

**Figure S8.** <sup>13</sup>C NMR spectrum of 1d

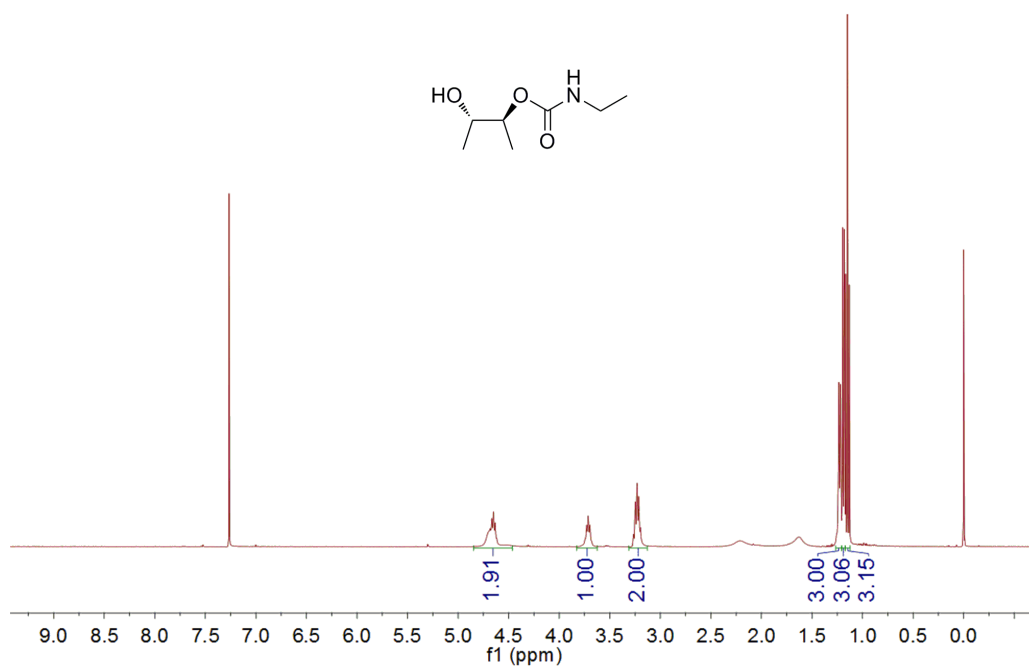

**Figure S9.** <sup>1</sup>H NMR spectrum of 1e

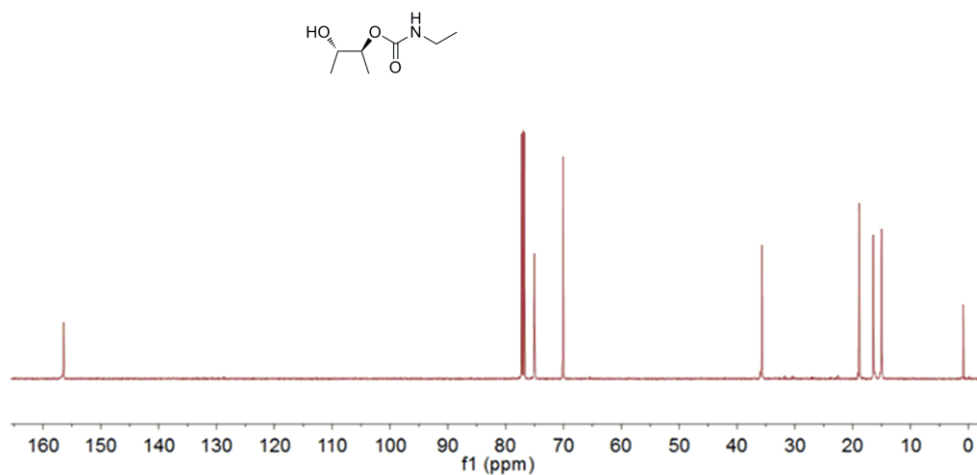

**Figure S10.** <sup>13</sup>C NMR spectrum of 1e

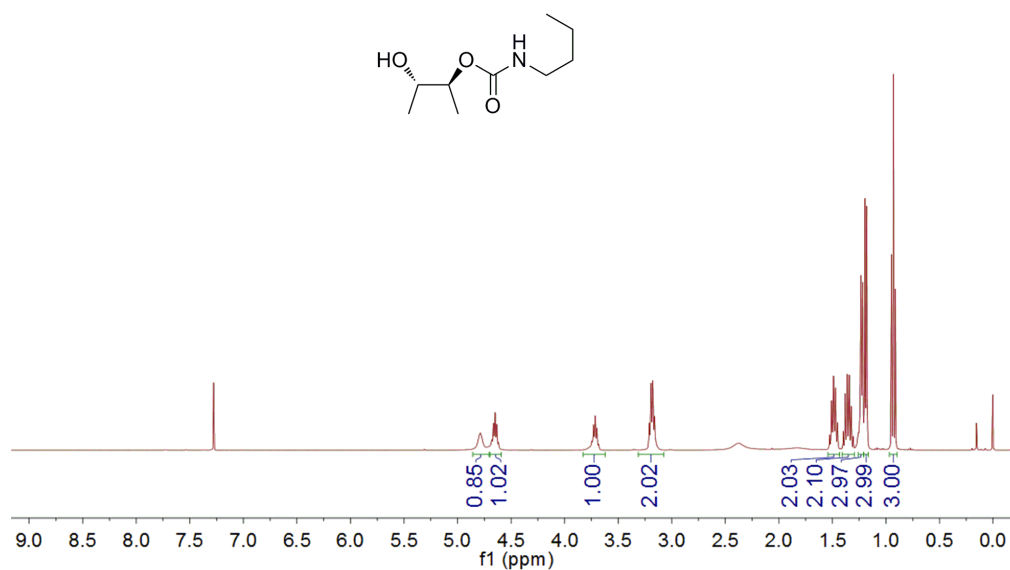

**Figure S11.** <sup>1</sup>H NMR spectrum of 1f

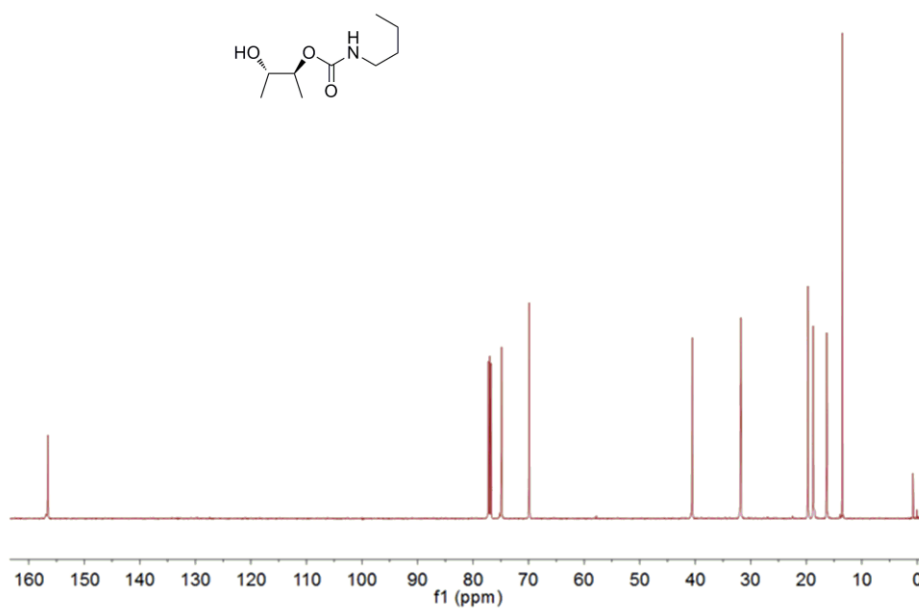

**Figure S12.** <sup>13</sup>C NMR spectrum of 1f

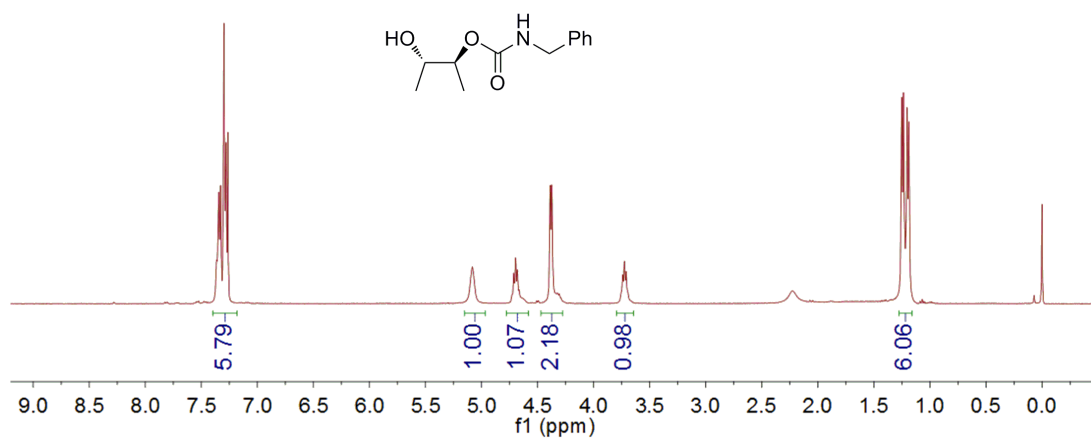

**Figure S13.** <sup>1</sup>H NMR spectrum of **1g**

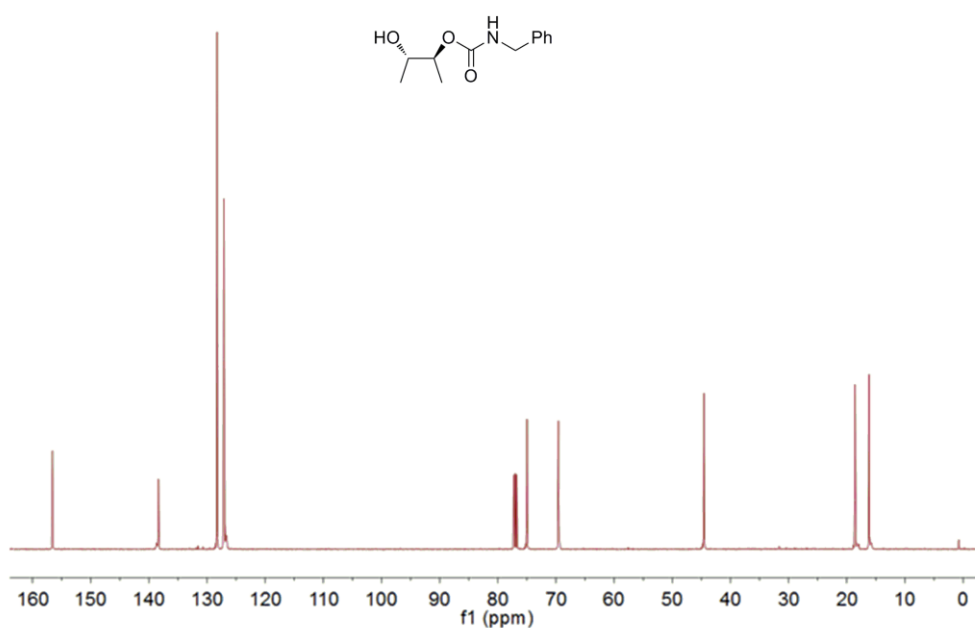

**Figure S14.** <sup>13</sup>C NMR spectrum of **1g**

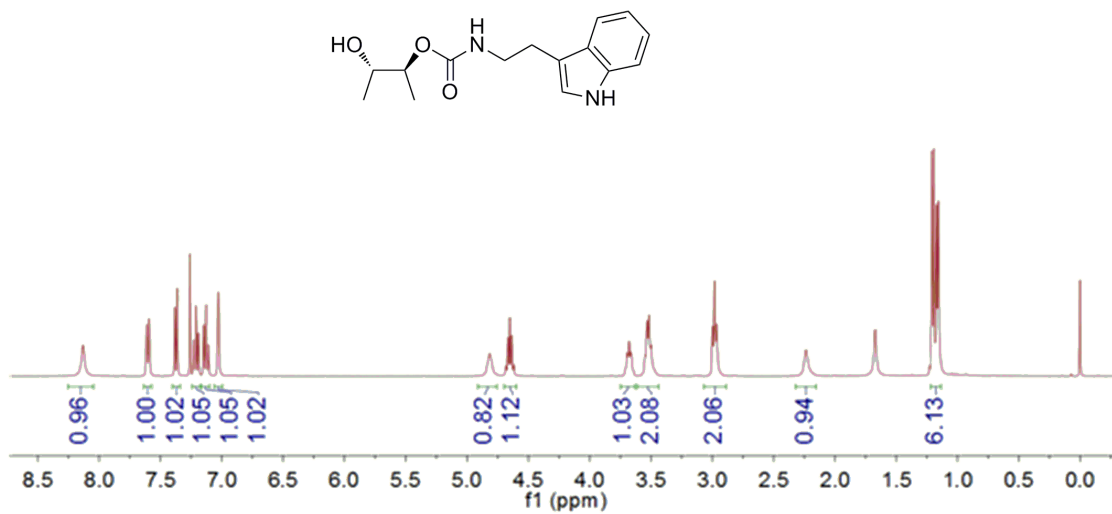

**Figure S15.** <sup>1</sup>H NMR spectrum of **1h**

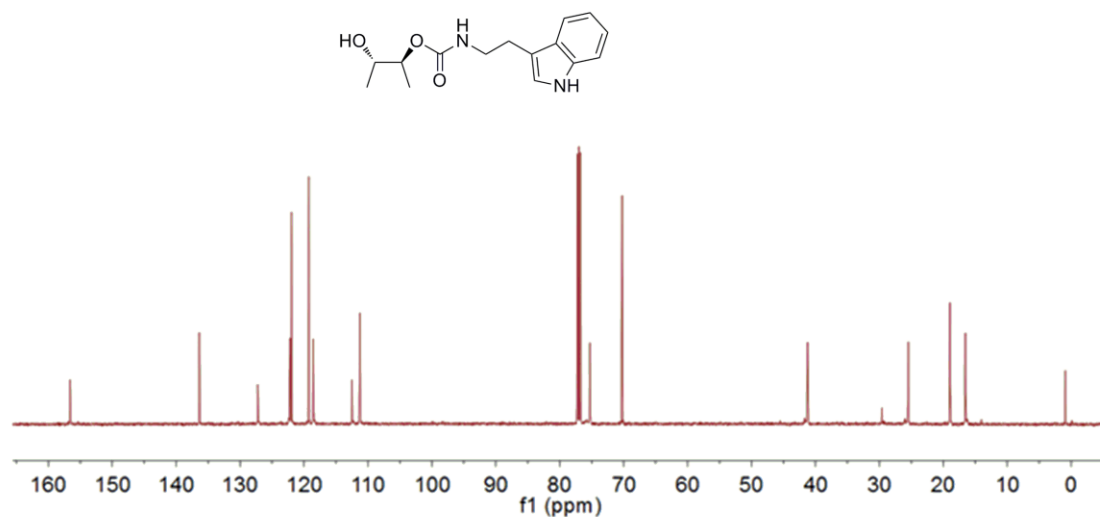

**Figure S16.** <sup>13</sup>C NMR spectrum of 1h

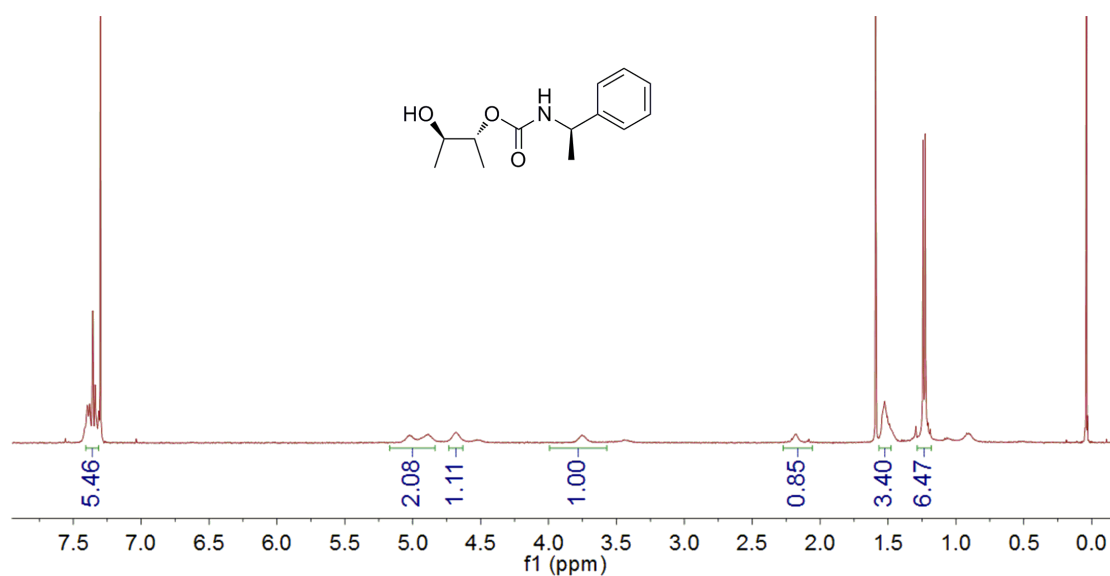

**Figure S17.** <sup>1</sup>H NMR spectrum of (R,R,R)-1i

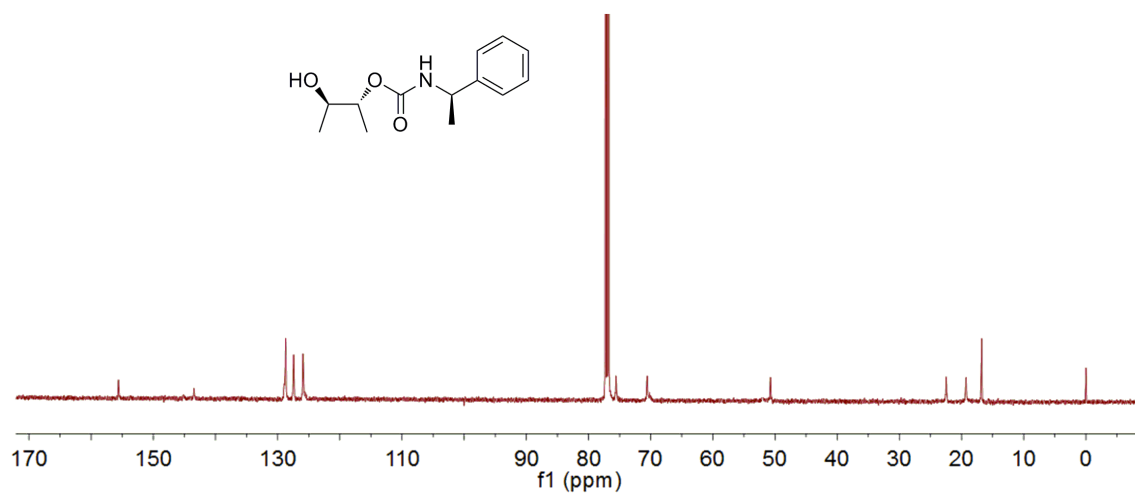

**Figure S18.** <sup>13</sup>C NMR spectrum of (R,R,R)-1i



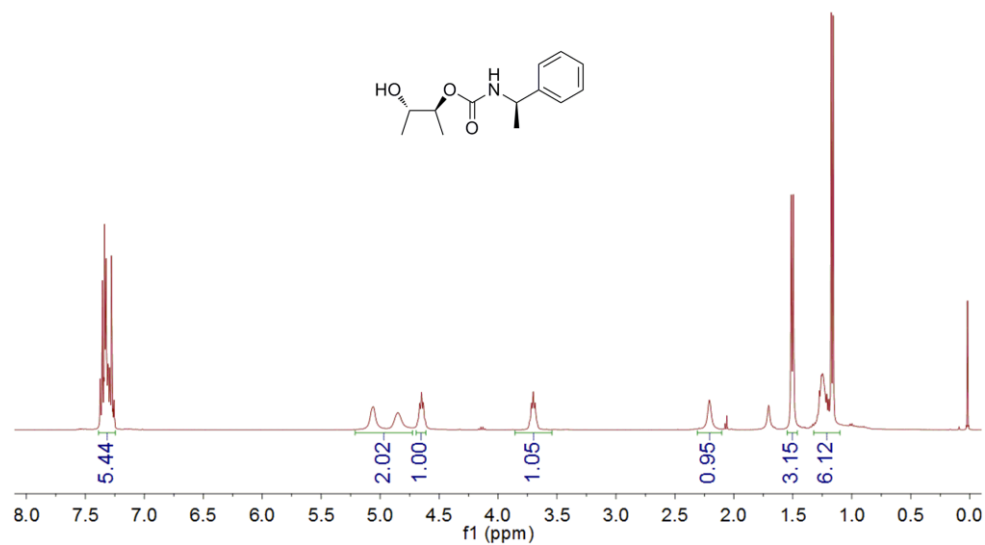

Figure S19. <sup>1</sup>H NMR spectrum of (*R,S,S*)-1i

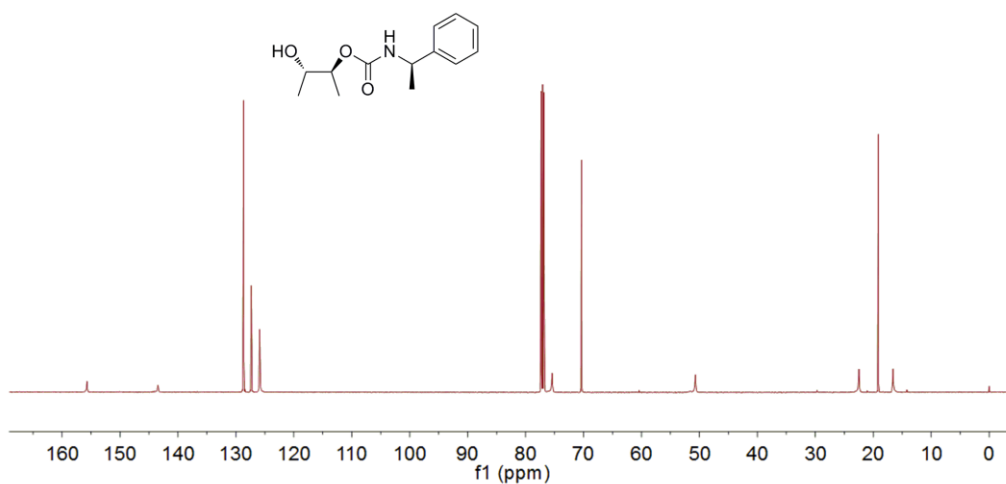

Figure S20. <sup>13</sup>C NMR spectrum of (*R,S,S*)-1i

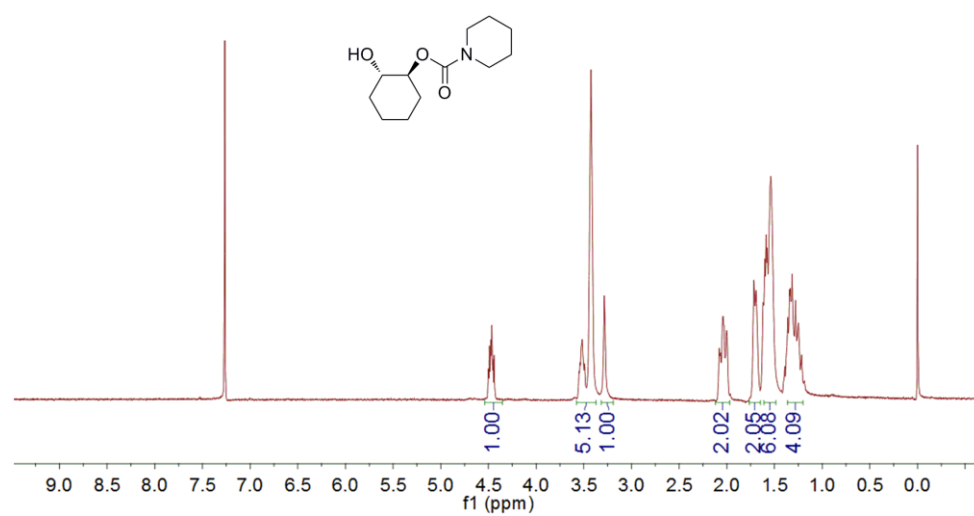

Figure S21. <sup>1</sup>H NMR spectrum of 2a

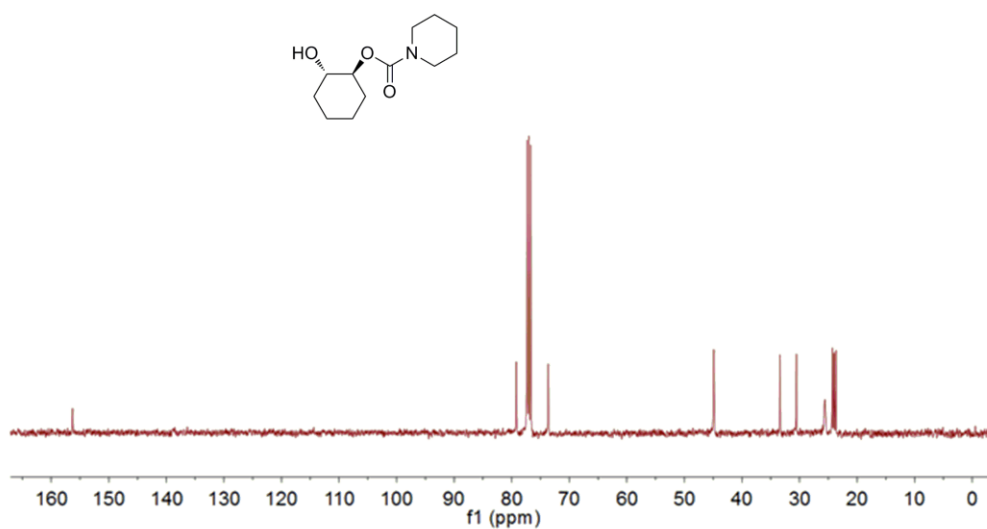

**Figure S22.**  $^{13}\text{C}$  NMR spectrum of **2a**

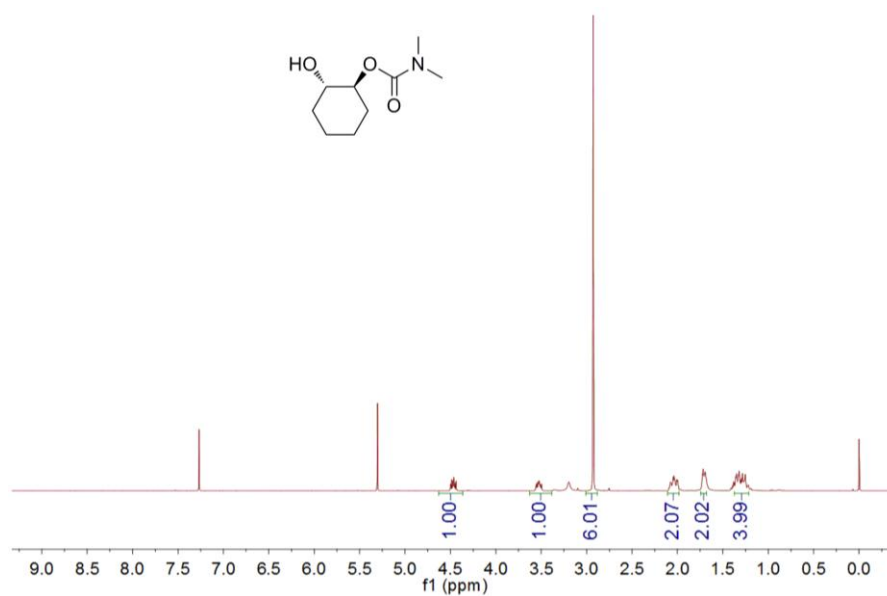

**Figure S23.**  $^1\text{H}$  NMR spectrum of **2b**

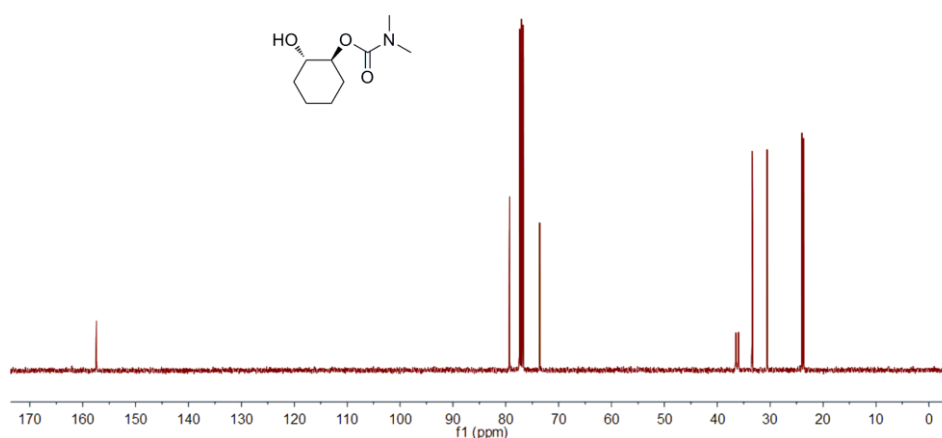

**Figure S24.**  $^{13}\text{C}$  NMR spectrum of **2b**

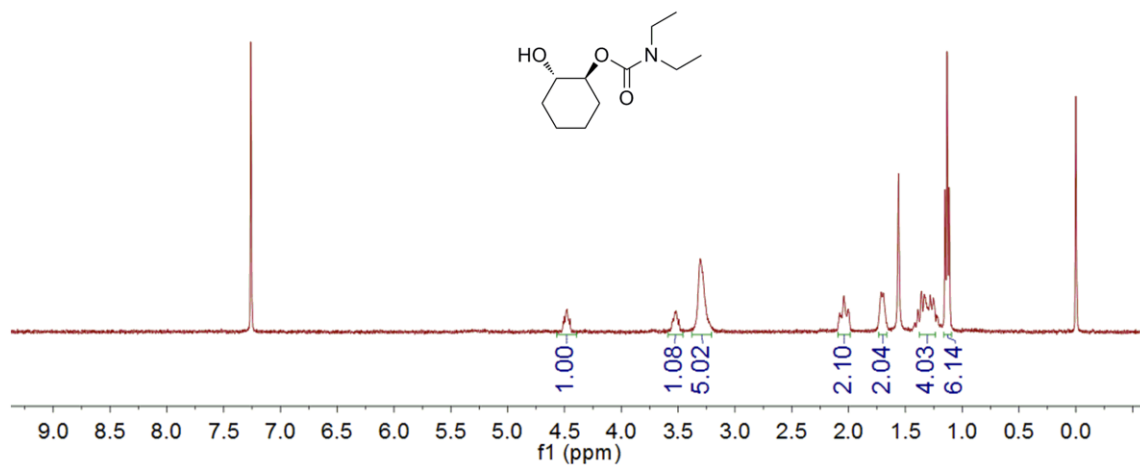

Figure S25. <sup>1</sup>H NMR spectrum of 2c

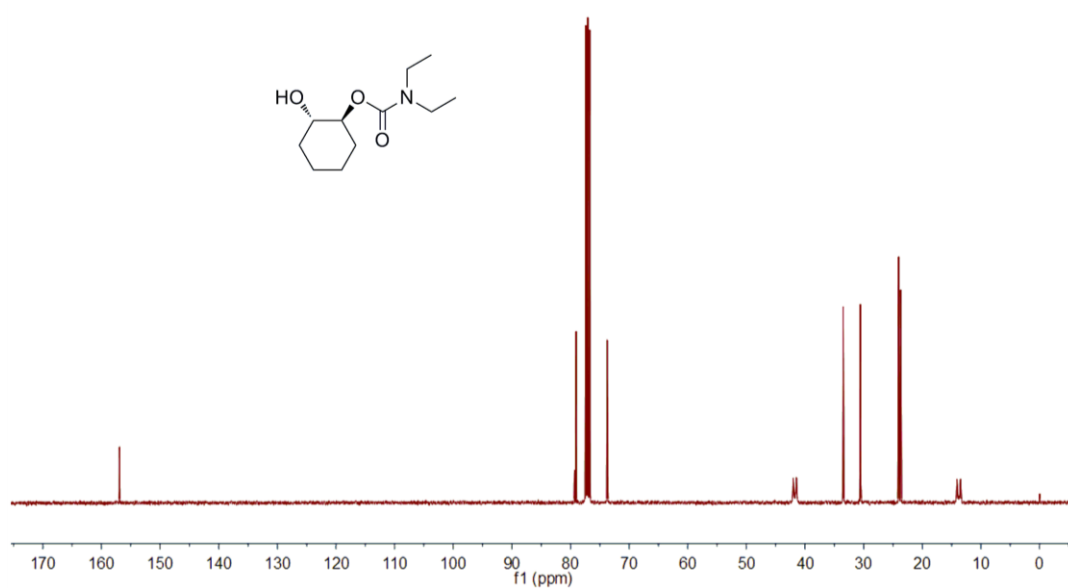

Figure S26. <sup>13</sup>C NMR spectrum of 2c

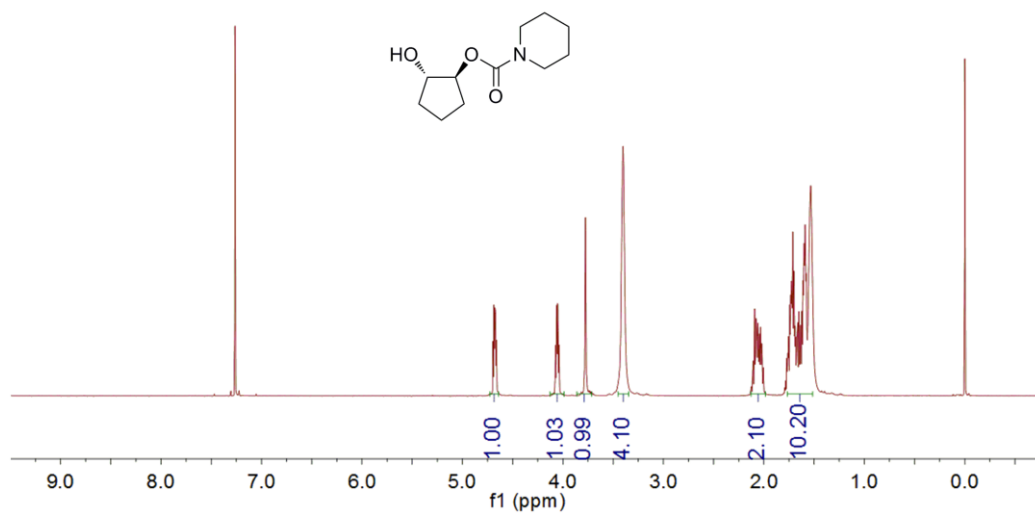

Figure S27. <sup>1</sup>H NMR spectrum of 3a

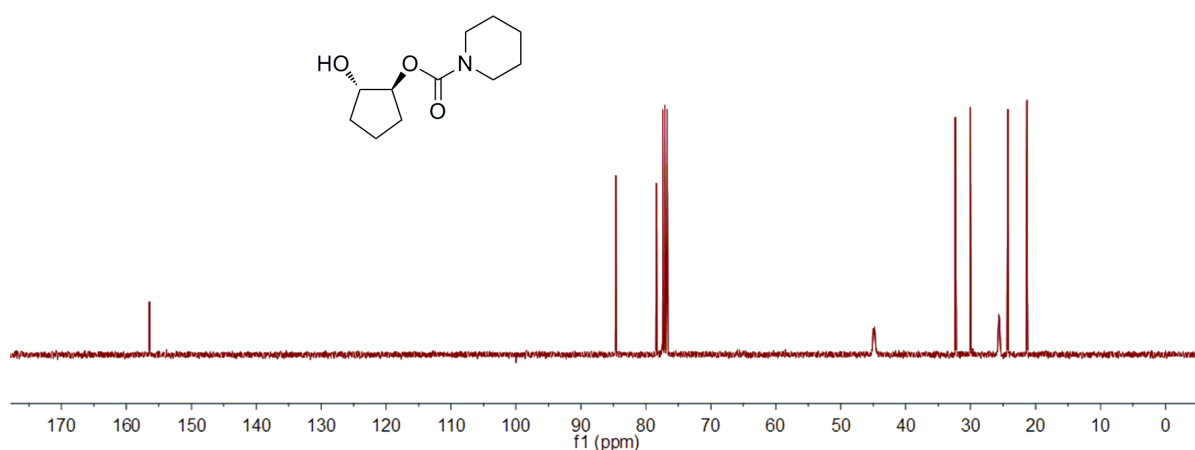

Figure S28. <sup>13</sup>C NMR spectrum of 3a

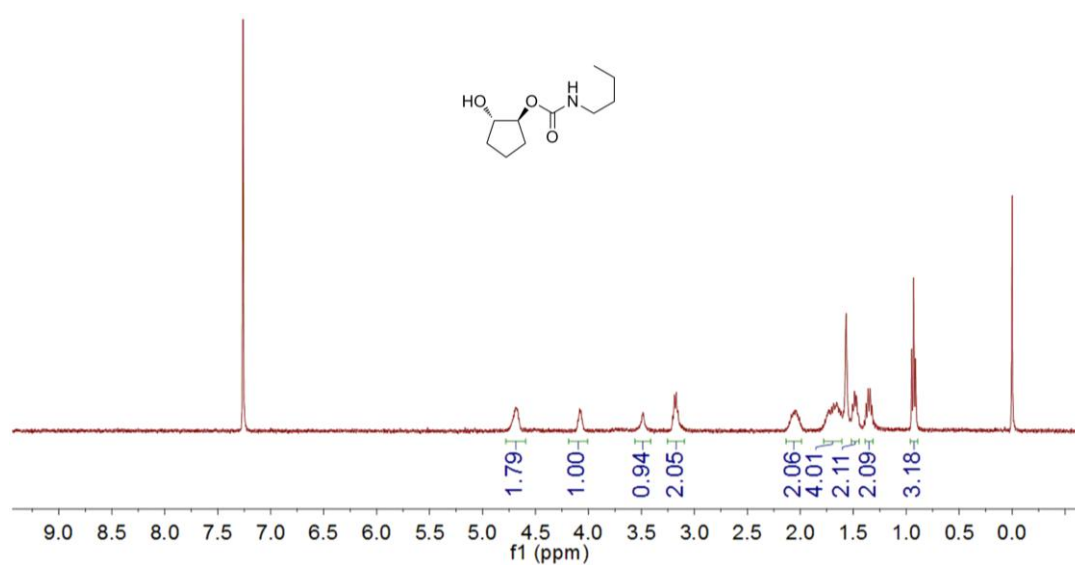

Figure S29. <sup>1</sup>H NMR spectrum of 3b

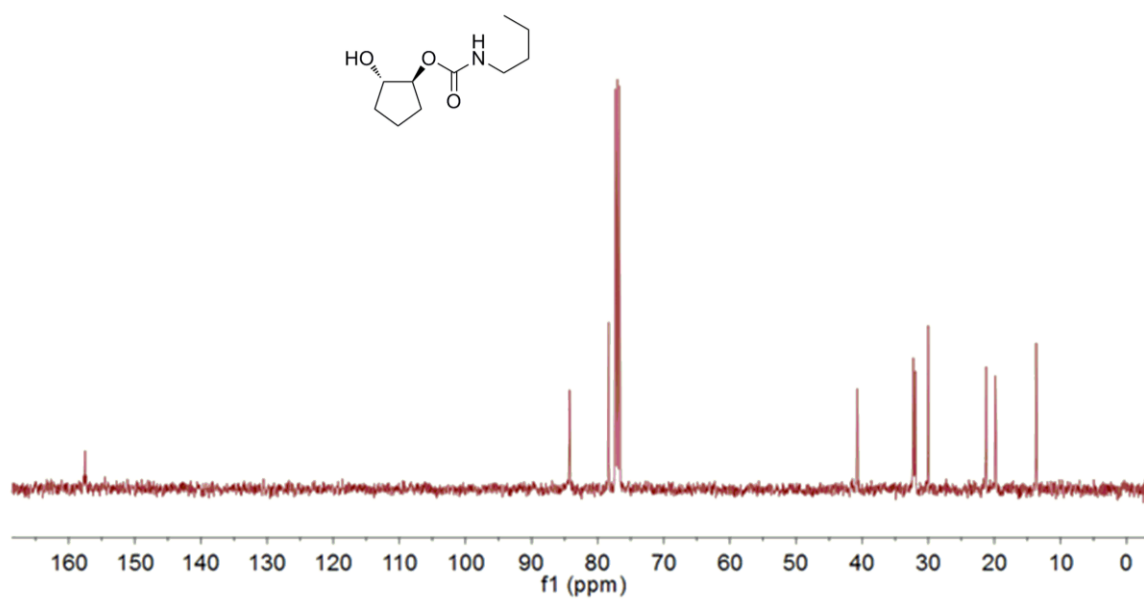

Figure S30. <sup>13</sup>C NMR spectrum of 3b

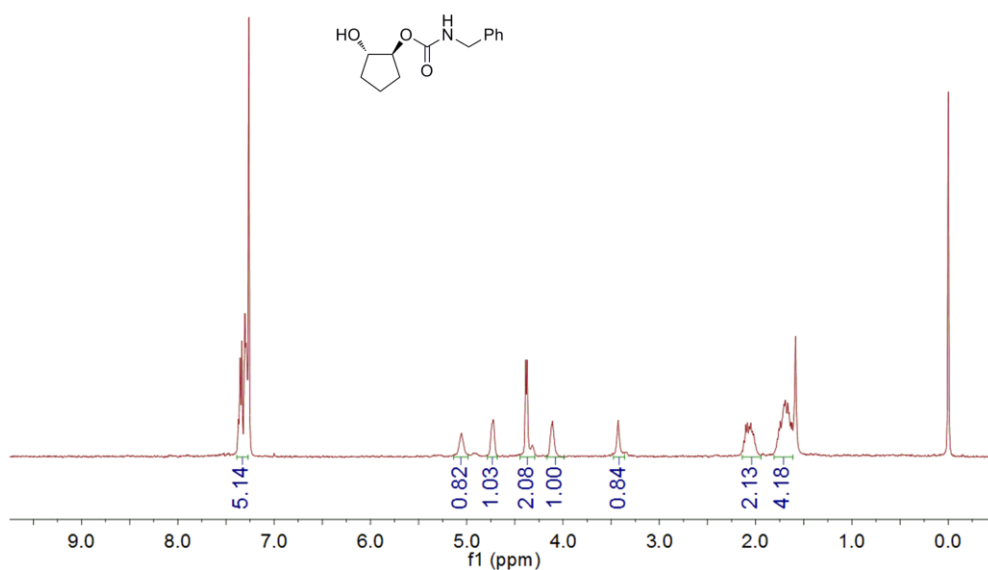

Figure S31. <sup>1</sup>H NMR spectrum of 3c

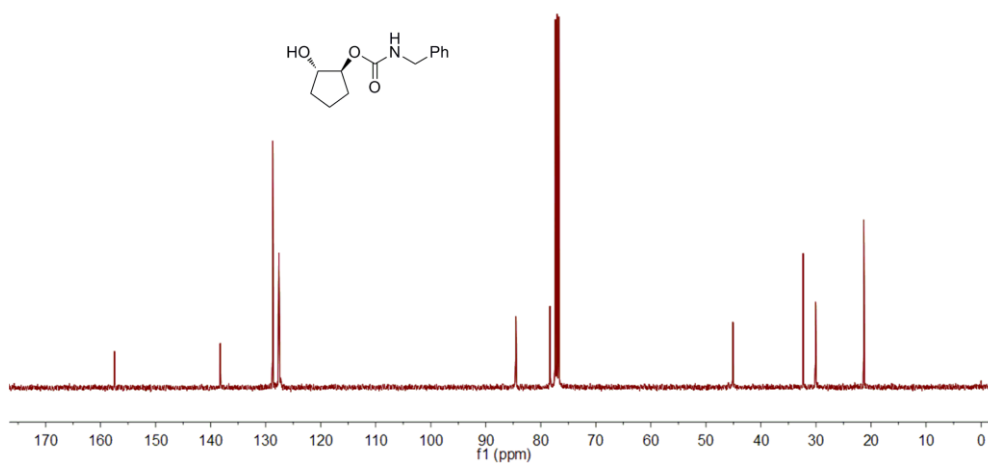

Figure S32. <sup>13</sup>C NMR spectrum of 3c

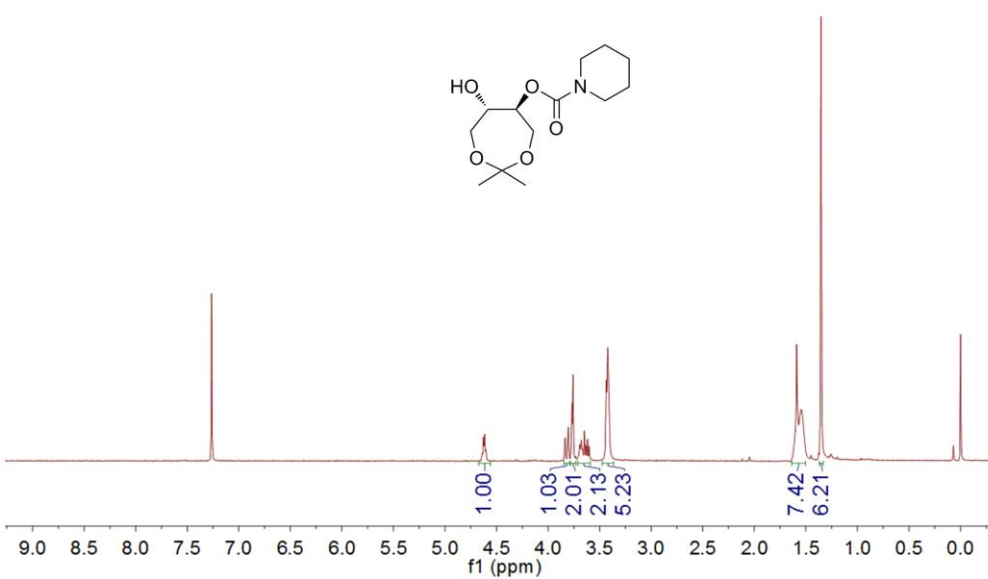

Figure S33. <sup>1</sup>H NMR spectrum of 4a

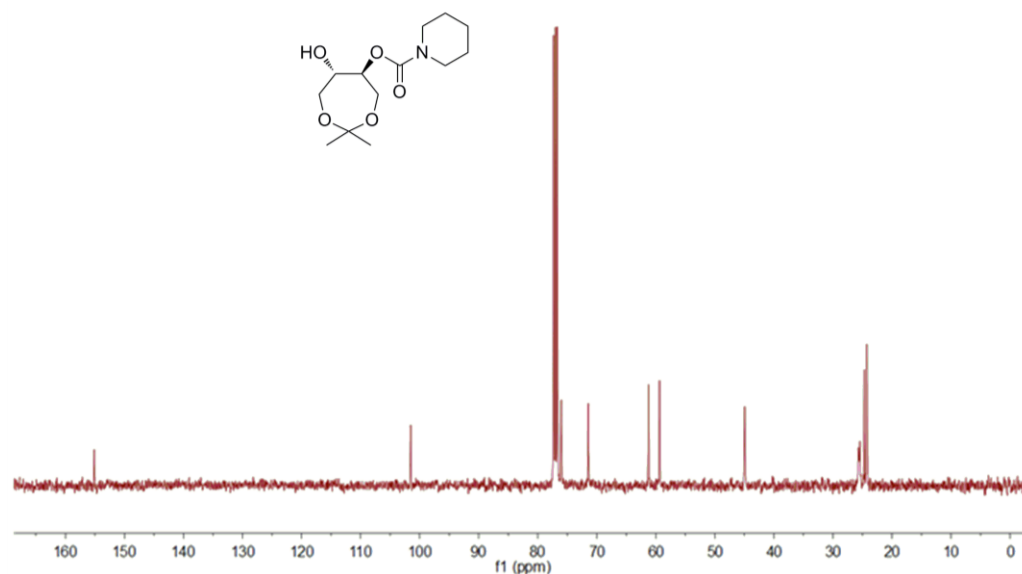

**Figure S34.** <sup>13</sup>C NMR spectrum of 4a

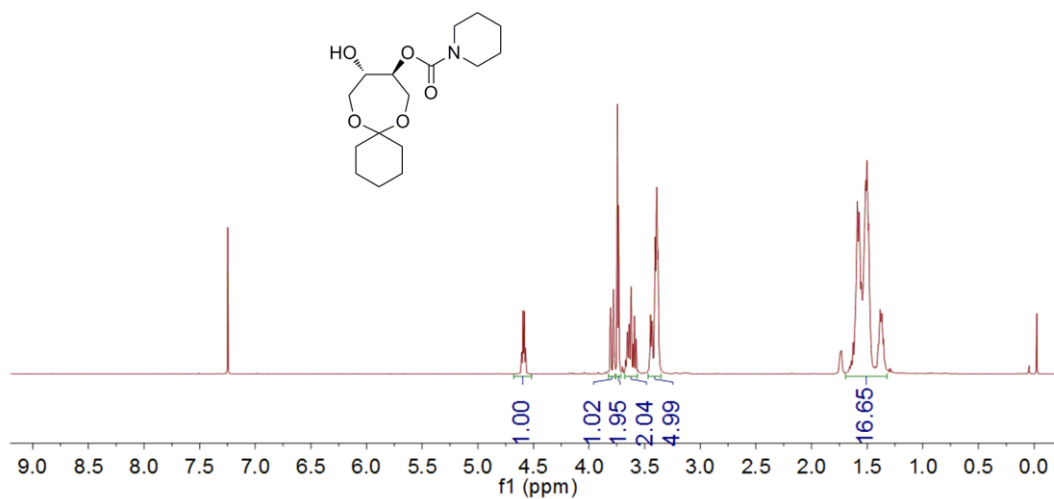

**Figure S35.** <sup>1</sup>H NMR spectrum of 4b

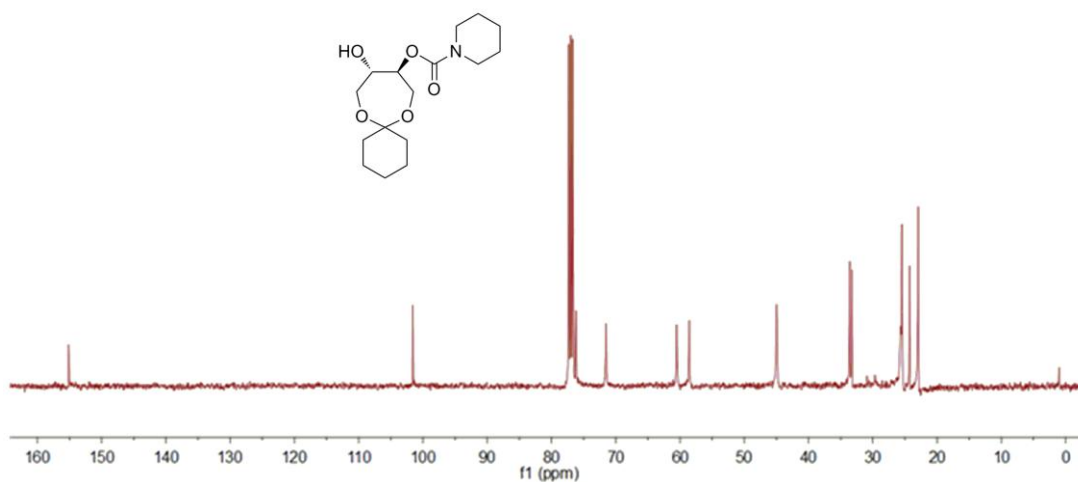

**Figure S36.** <sup>13</sup>C NMR spectrum of 4b

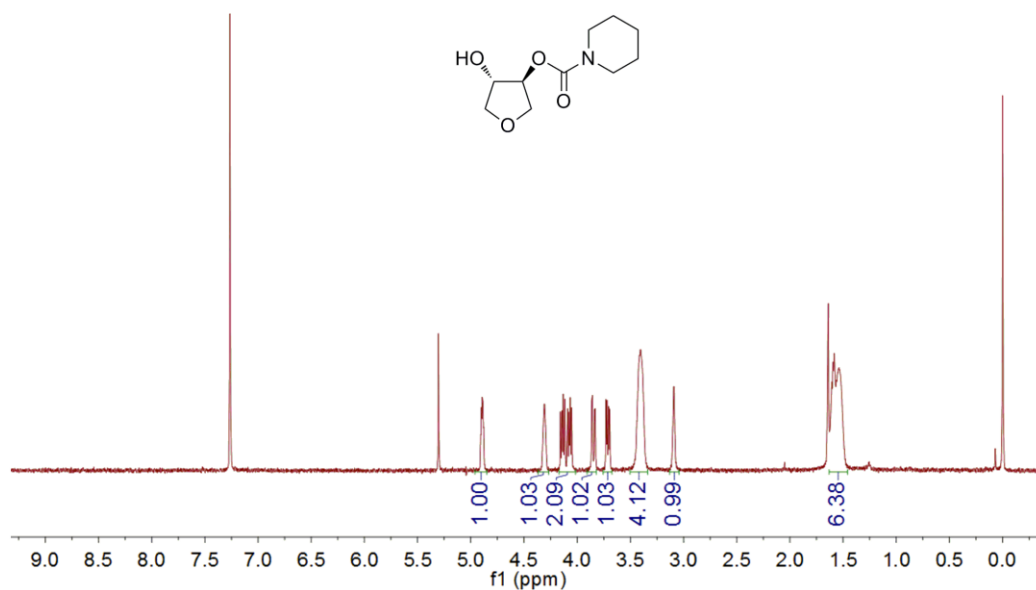

Figure S37. <sup>1</sup>H NMR spectrum of 5a

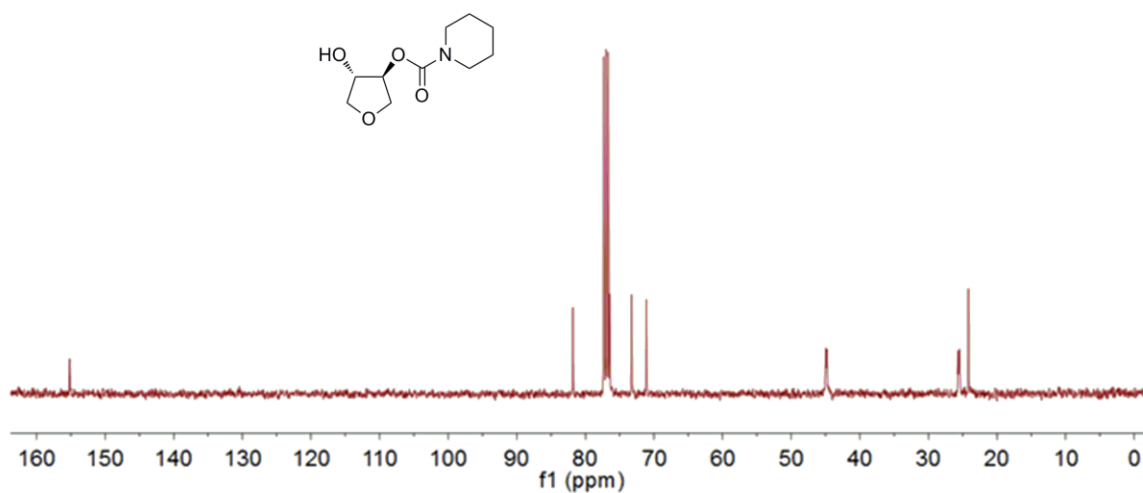

Figure S38. <sup>13</sup>C NMR spectrum of 5a

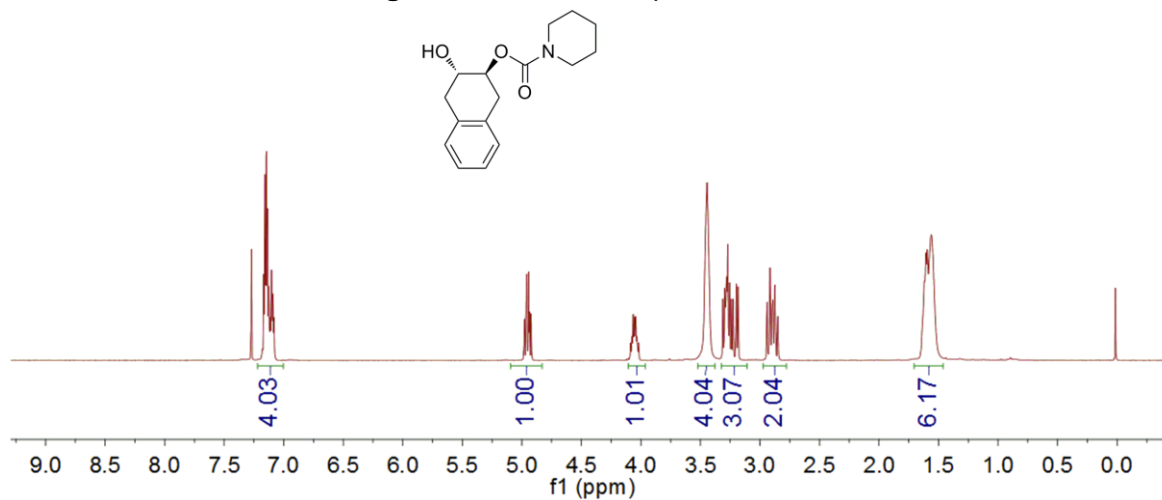

Figure S39. <sup>1</sup>H NMR spectrum of 6a

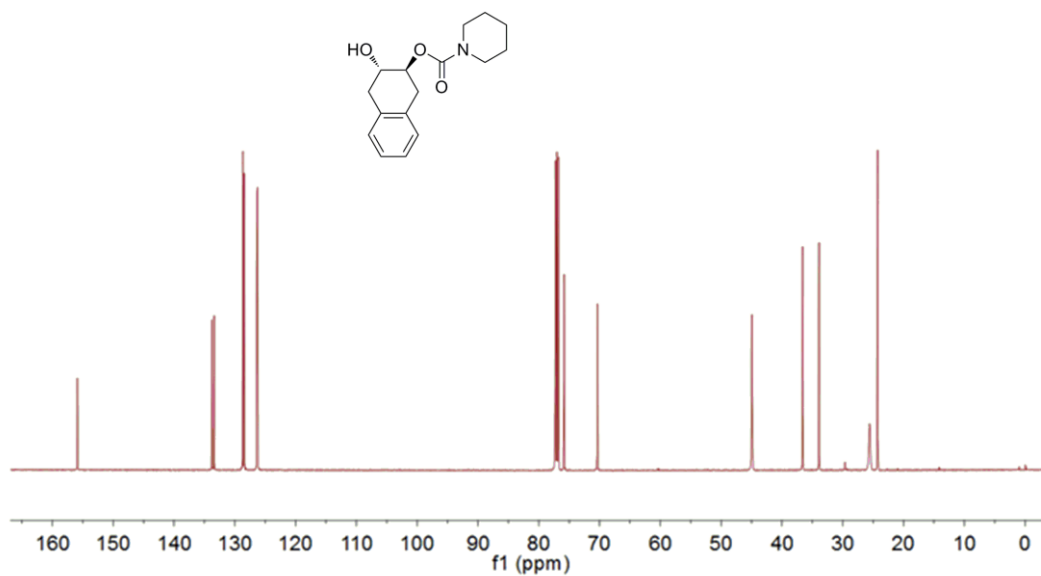

**Figure S40.** <sup>13</sup>C NMR spectrum of 6a

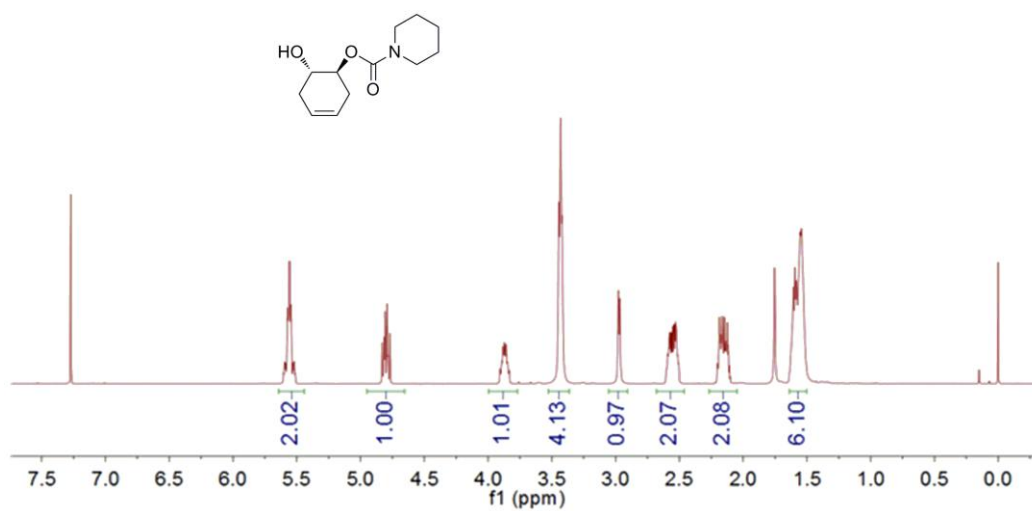

**Figure S41.** <sup>1</sup>H NMR spectrum of 7a

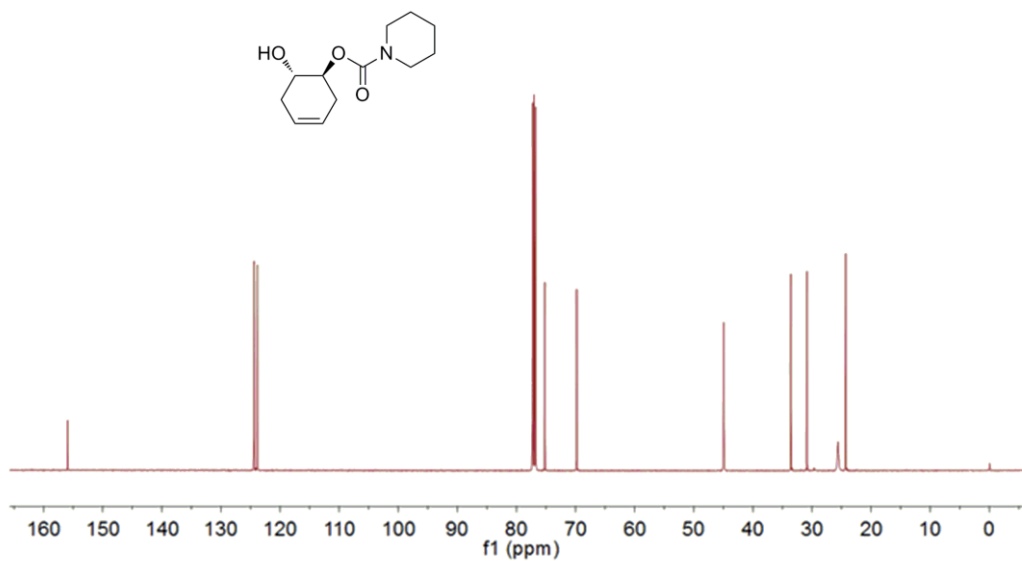

**Figure S42.** <sup>13</sup>C NMR spectrum of 7a



### 3. HPLC spectrum of various carbamate derivatives

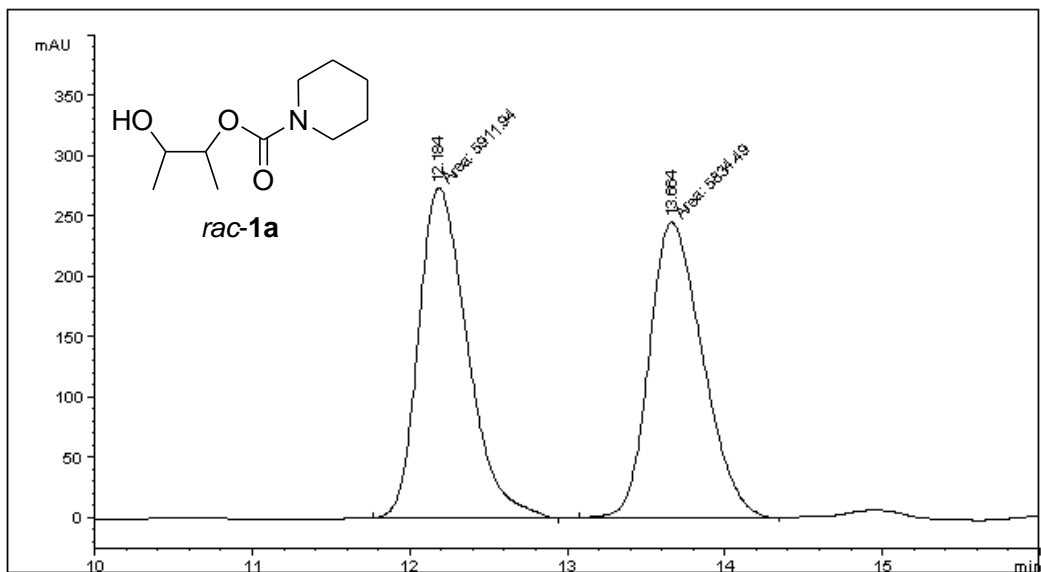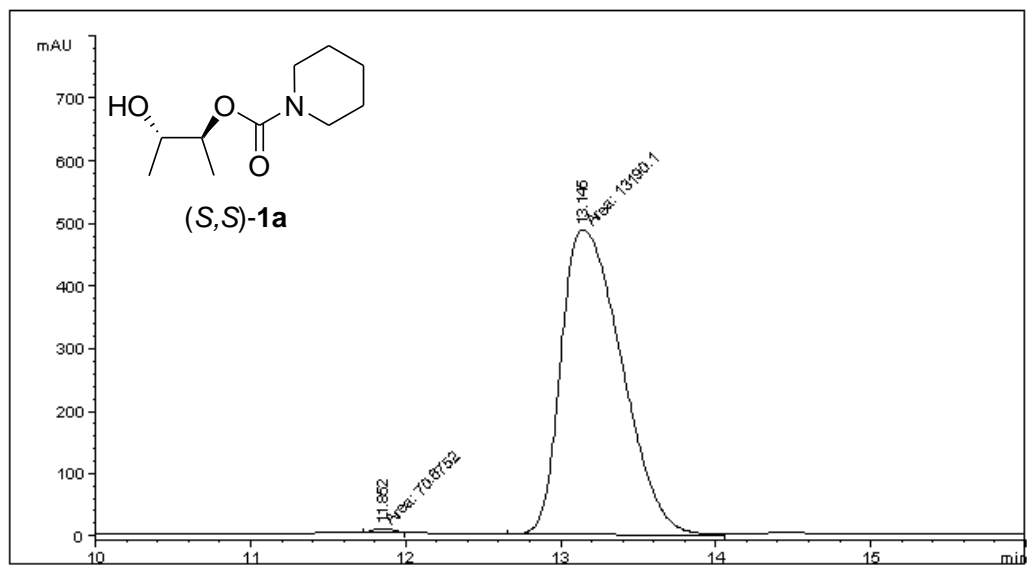

```

=====
                        Area Percent Report
=====
Sorted By      :      Signal
Multiplier     :      1.0000
Dilution      :      1.0000
Use Multiplier & Dilution Factor with ISTDs
  
```

Signal 1: VWD1 A, Wavelength=210 nm

| Peak # | RetTime [min] | Type | Width [min] | Area mAU  | Area *s   | Height [mAU] | Area % |
|--------|---------------|------|-------------|-----------|-----------|--------------|--------|
| 1      | 11.852        | MM   | 0.1714      | 70.67524  | 6.87367   | 0.5330       |        |
| 2      | 13.145        | MM   | 0.4519      | 1.31901e4 | 486.52310 | 99.4670      |        |

Totals : 1.32608e4 493.39677

**Figure S43.** HPLC spectrum of **1a**

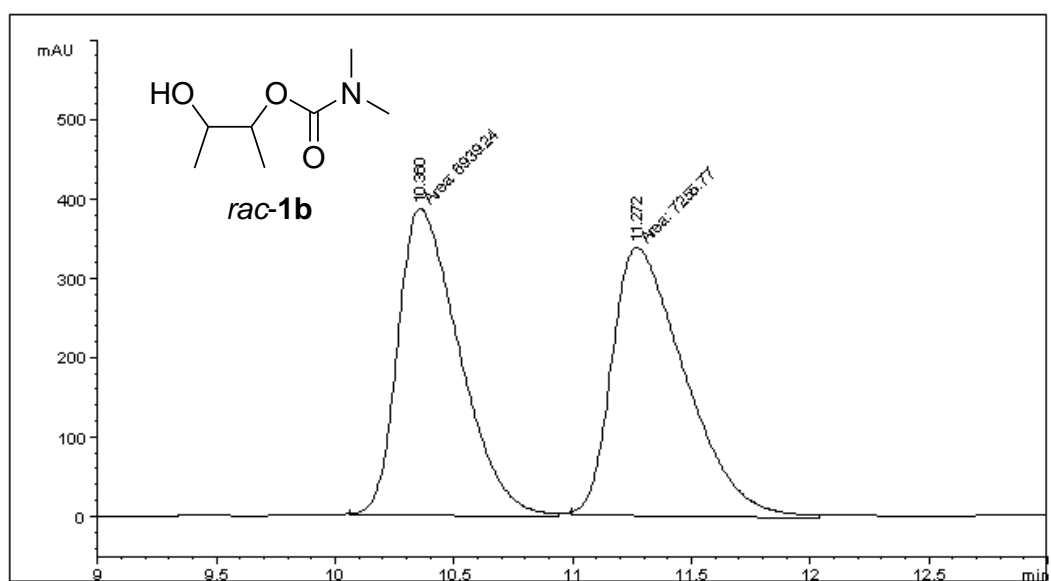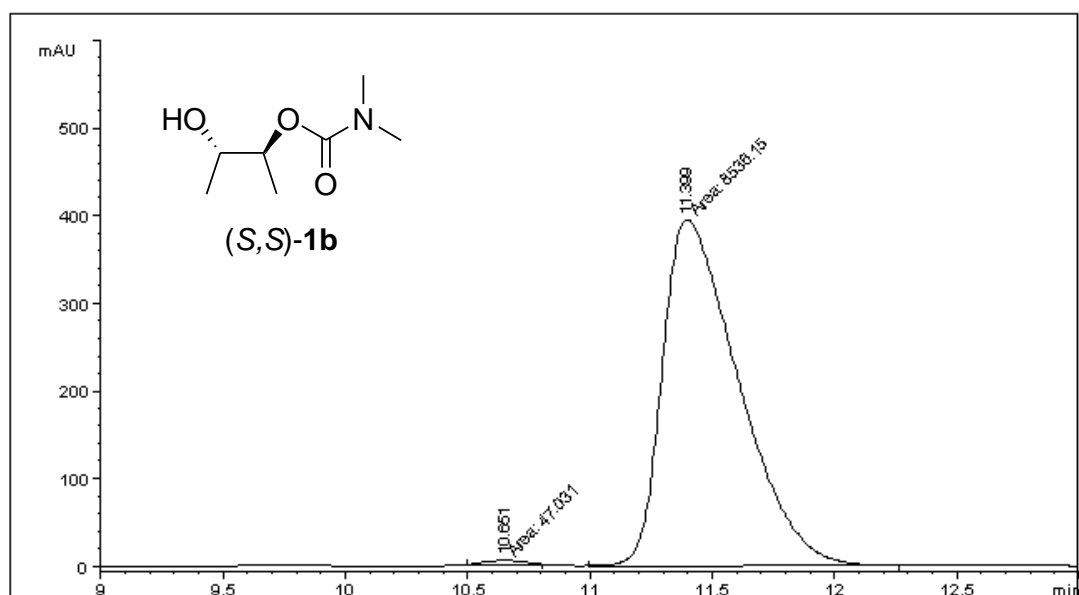

=====  
 Area Percent Report  
 =====

Sorted By : Signal  
 Multiplier : 1.0000  
 Dilution : 1.0000  
 Use Multiplier & Dilution Factor with ISTDs

Signal 1: VWD1 A, Wavelength=210 nm

| Peak # | RetTime [min] | Type | Width [min] | Area mAU   | Height [mAU] | Area %  |
|--------|---------------|------|-------------|------------|--------------|---------|
| 1      | 10.651        | MM   | 0.1882      | 47.03099   | 4.16606      | 0.5479  |
| 2      | 11.399        | MM   | 0.3601      | 8536.14941 | 395.13409    | 99.4521 |

Totals : 8583.18041 399.30016

**Figure S44.** HPLC spectrum of 1b

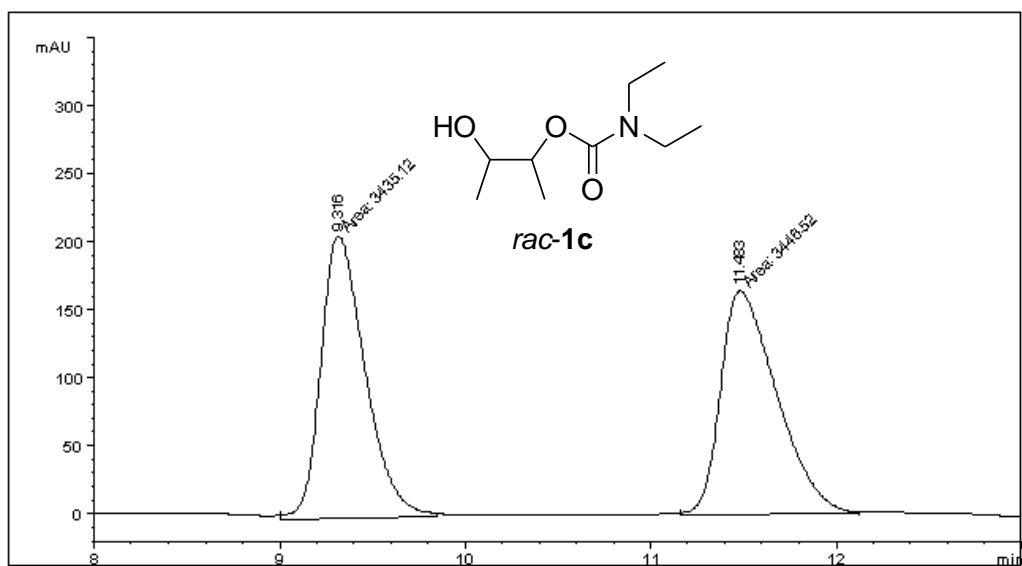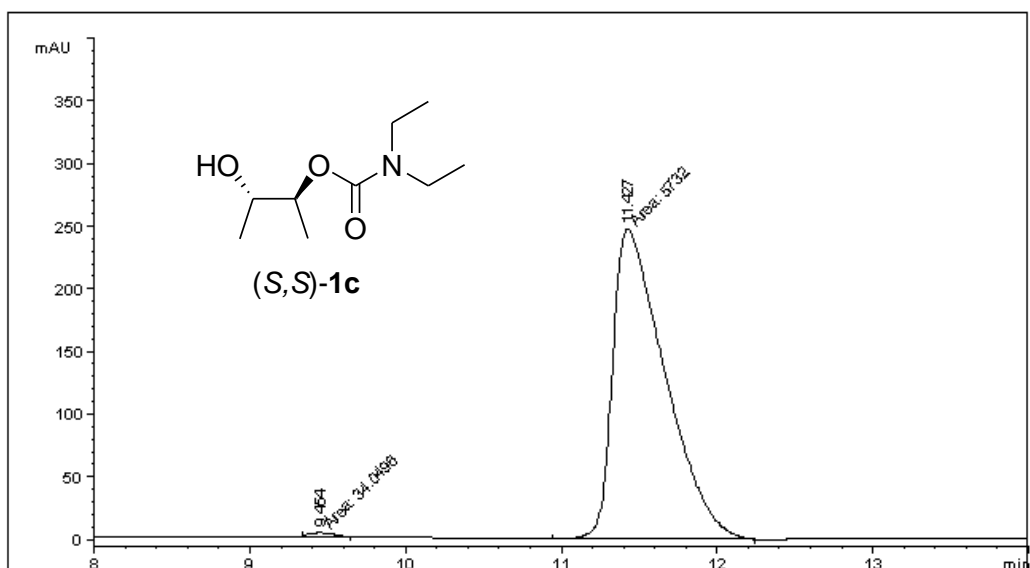

=====  
 Area Percent Report  
 =====

Sorted By : Signal  
 Multiplier : 1.0000  
 Dilution : 1.0000  
 Use Multiplier & Dilution Factor with ISTDs

Signal 1: VWD1 A, Wavelength=210 nm

| Peak # | RetTime [min] | Type | Width [min] | Area mAU   | *s | Height [mAU] | Area %  |
|--------|---------------|------|-------------|------------|----|--------------|---------|
| 1      | 9.454         | MM   | 0.1767      | 34.04962   |    | 3.21191      | 0.5905  |
| 2      | 11.427        | MM   | 0.3878      | 5731.99854 |    | 246.32578    | 99.4095 |

Totals : 5766.04816 249.53768

**Figure S45.** HPLC spectrum of 1c

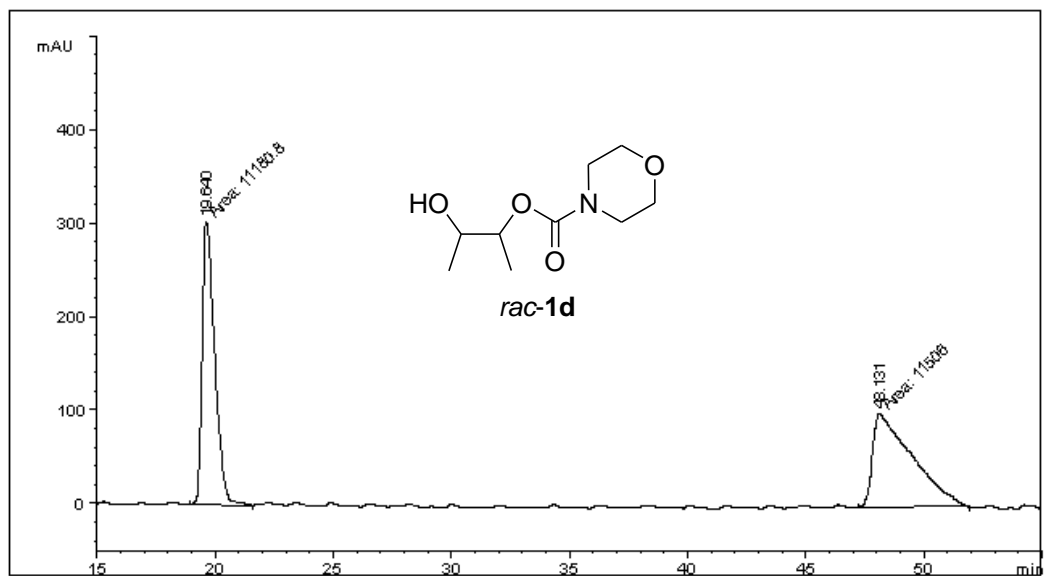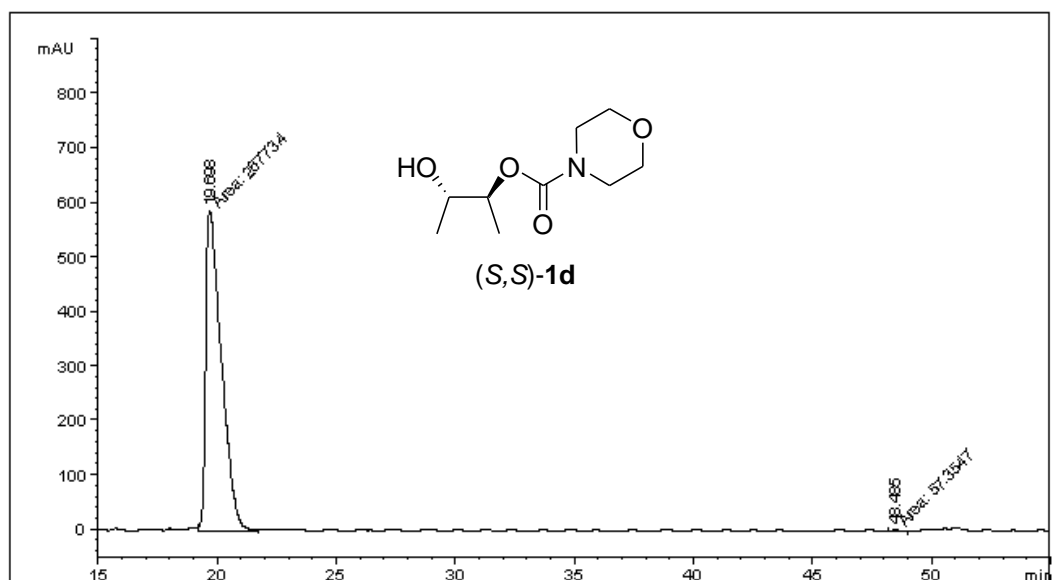

=====  
 Area Percent Report  
 =====

Sorted By : Signal  
 Multiplier : 1.0000  
 Dilution : 1.0000  
 Use Multiplier & Dilution Factor with ISTDs

Signal 1: VWD1 A, Wavelength=210 nm

| Peak # | RetTime [min] | Type | Width [min] | Area mAU  | Height [mAU] | Area %  |
|--------|---------------|------|-------------|-----------|--------------|---------|
| 1      | 19.698        | MM   | 0.7617      | 2.67734e4 | 585.84711    | 99.7862 |
| 2      | 48.485        | MM   | 0.3967      | 57.35474  | 2.40937      | 0.2138  |

Totals : 2.68308e4 588.25648

**Figure S46.** HPLC spectrum of 1d

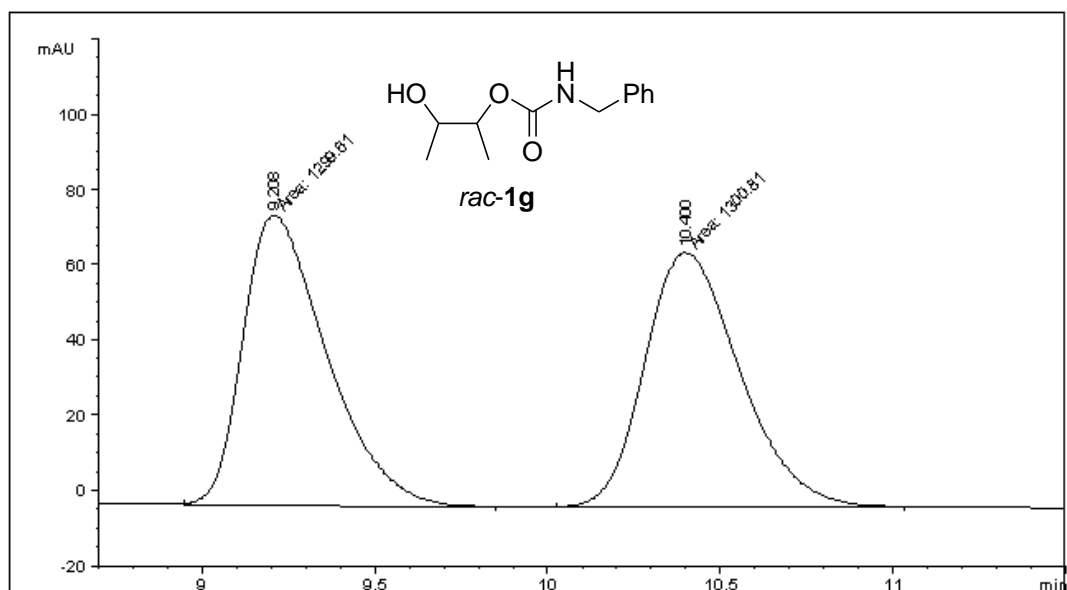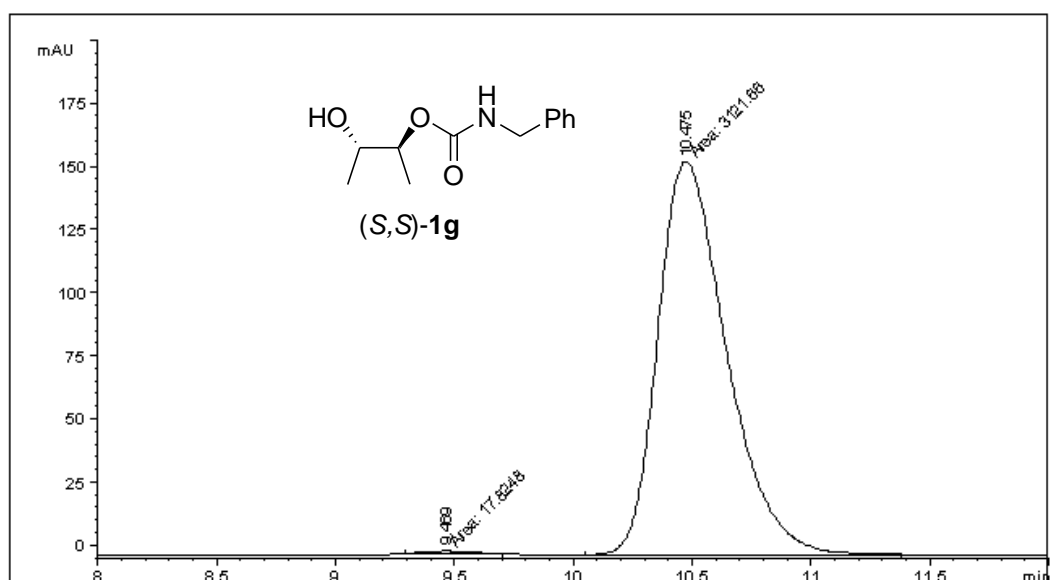

=====  
 Area Percent Report  
 =====

Sorted By : Signal  
 Multiplier : 1.0000  
 Dilution : 1.0000  
 Use Multiplier & Dilution Factor with ISTDs

Signal 1: VWD1 A, Wavelength=254 nm

| Peak # | RetTime [min] | Type | Width [min] | Area mAU   | Area *s | Height [mAU] | Area %  |
|--------|---------------|------|-------------|------------|---------|--------------|---------|
| 1      | 9.469         | MM   | 0.2316      | 17.82478   |         | 1.28300      | 0.5678  |
| 2      | 10.475        | MM   | 0.3342      | 3121.66064 |         | 155.68118    | 99.4322 |

Totals : 3139.48543 156.96419

**Figure S47.** HPLC spectrum of **1g**

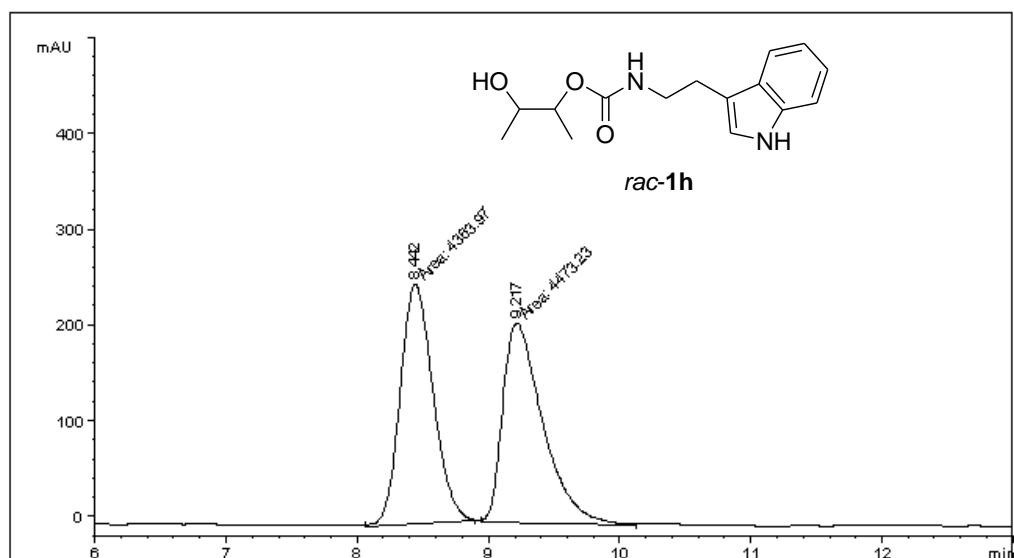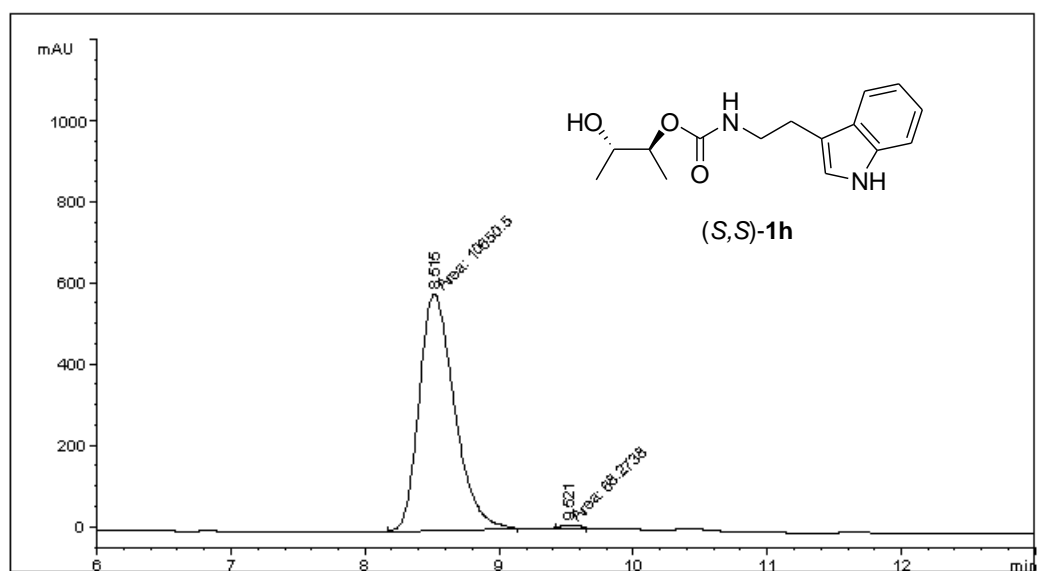

=====  
 Area Percent Report  
 =====

Sorted By : Signal  
 Multiplier : 1.0000  
 Dilution : 1.0000  
 Use Multiplier & Dilution Factor with ISTDs

Signal 1: VWD1 A, Wavelength=254 nm

| Peak # | RetTime [min] | Type | Width [min] | Area mAU  | Area %  | Height [mAU] |
|--------|---------------|------|-------------|-----------|---------|--------------|
| 1      | 8.515         | MM   | 0.3053      | 1.06505e4 | 99.3630 | 581.40015    |
| 2      | 9.521         | MM   | 0.1444      | 68.27383  | 0.6370  | 7.87924      |

Totals : 1.07187e4 589.27939

**Figure S48.** HPLC spectrum of 1h

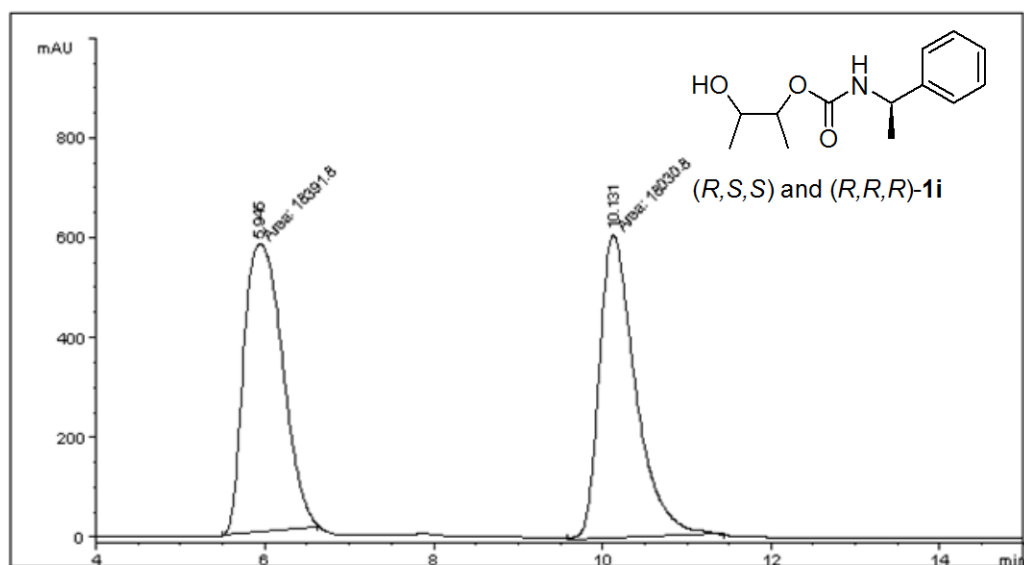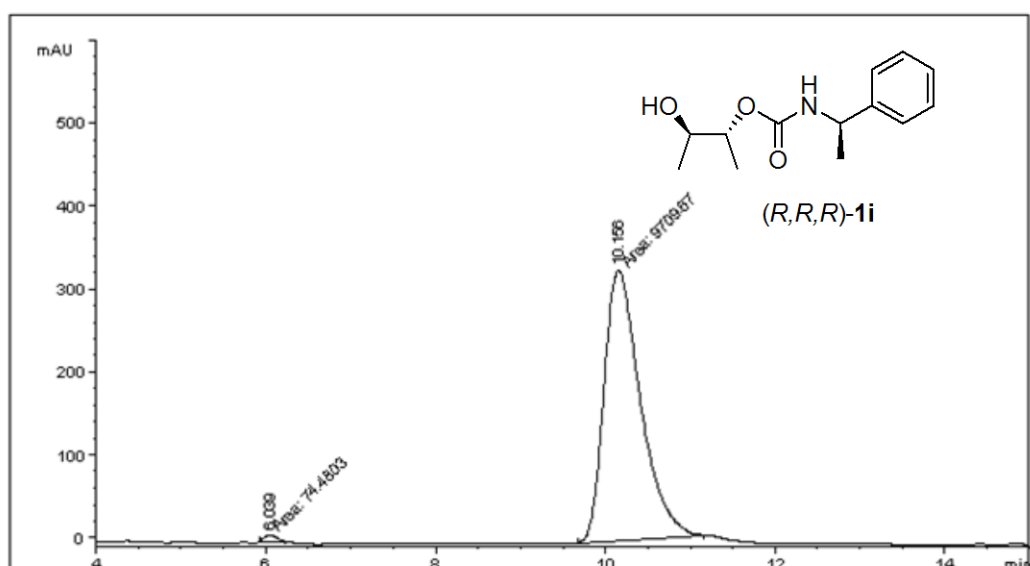

=====  
 Area Percent Report  
 =====

Sorted By : Signal  
 Multiplier : 1.0000  
 Dilution : 1.0000  
 Use Multiplier & Dilution Factor with ISTDs

Signal 1: VWD1 A, Wavelength=214 nm

| Peak # | RetTime [min] | Type | Width [min] | Area mAU   | Area %  | Height [mAU] |
|--------|---------------|------|-------------|------------|---------|--------------|
| 1      | 6.039         | MM   | 0.1731      | 74.48032   | 0.7612  | 7.17204      |
| 2      | 10.156        | MM   | 0.4974      | 9709.66895 | 99.2388 | 325.32822    |

Totals : 9784.14927 332.50025

**Figure S49.** HPLC spectrum of (R,R,R)-1i

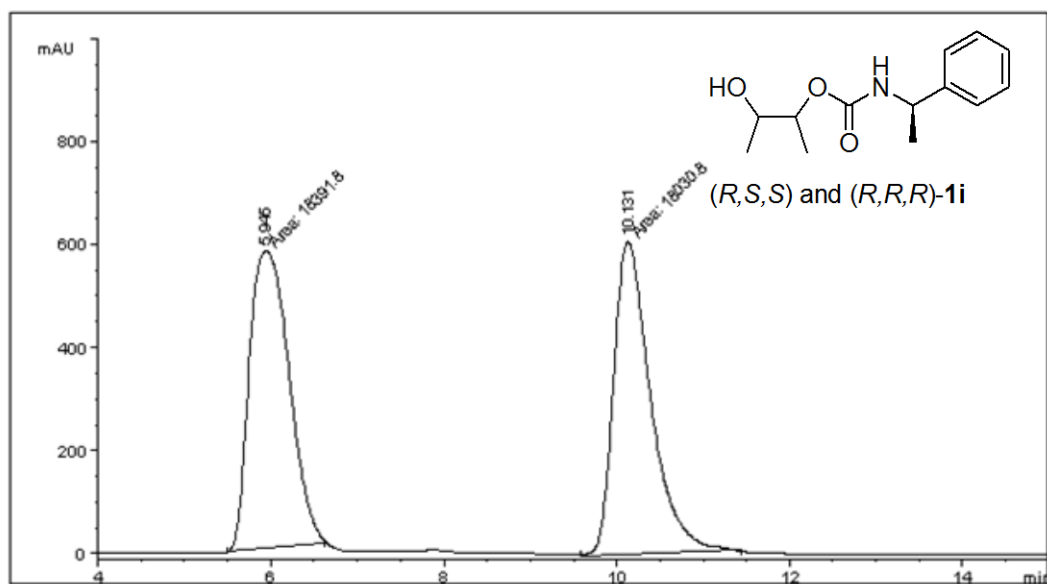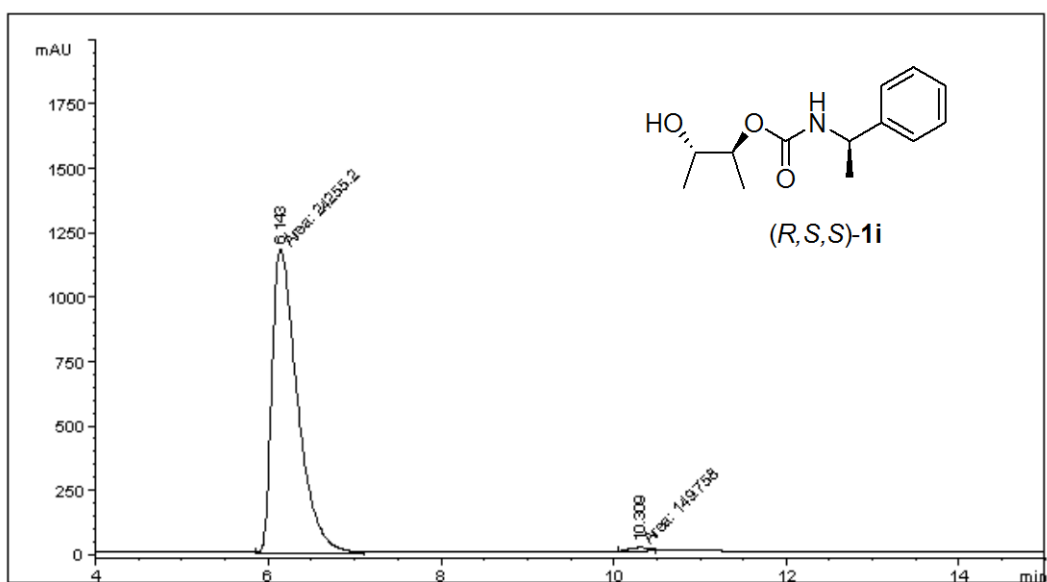

```

=====
                        Area Percent Report
=====
Sorted By      :      Signal
Multiplier     :      1.0000
Dilution      :      1.0000
Use Multiplier & Dilution Factor with ISTDs

Signal 1: VWD1 A, Wavelength=214 nm

Peak RetTime Type Width Area Height Area
# [min] [min] mAU *s [mAU] %
-----|-----|-----|-----|-----|
1 6.143 MM 0.3425 2.42552e4 1180.28345 99.3864
2 10.309 MM 0.2689 149.75768 9.28065 0.6136
Totals : 2.44050e4 1189.56410

```

**Figure S50.** HPLC spectrum of (R,S,S)-1i



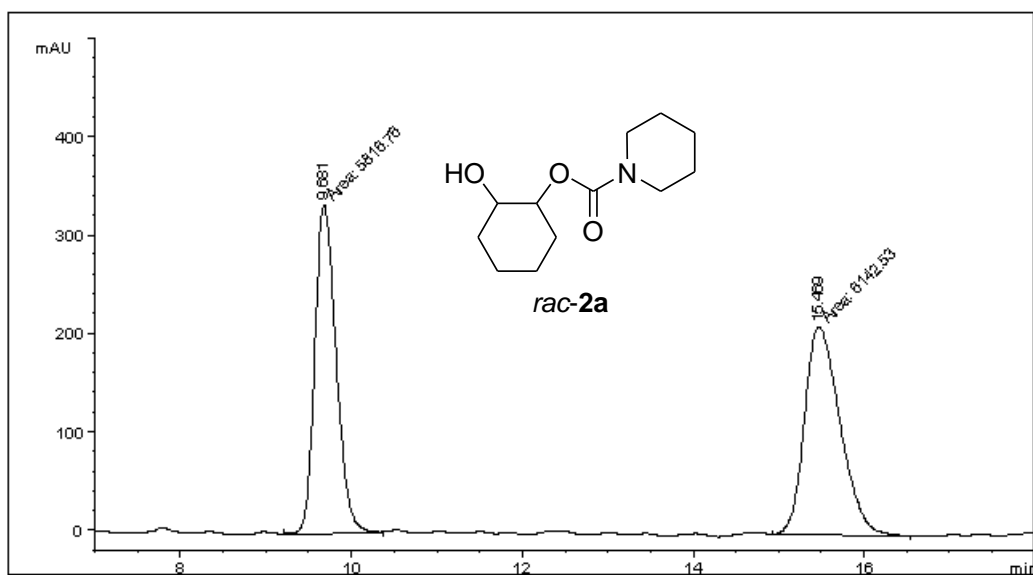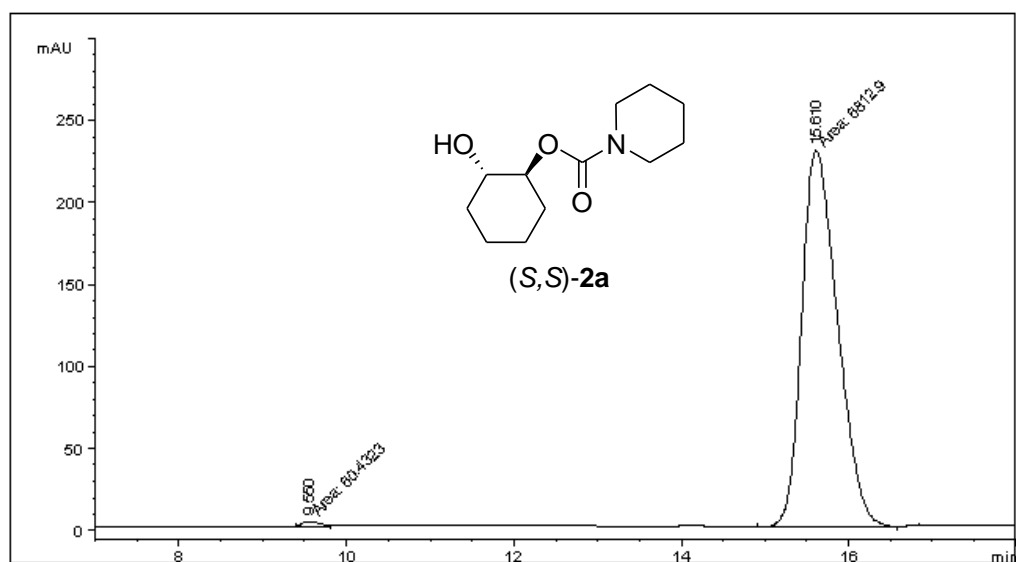

=====  
 Area Percent Report  
 =====

Sorted By : Signal  
 Multiplier : 1.0000  
 Dilution : 1.0000  
 Use Multiplier & Dilution Factor with ISTDs

Signal 1: VWD1 A, Wavelength=210 nm

| Peak # | RetTime [min] | Type | Width [min] | Area mAU *s | Height [mAU] | Area %  |
|--------|---------------|------|-------------|-------------|--------------|---------|
| 1      | 9.550         | MM   | 0.2592      | 60.43233    | 3.88596      | 0.8792  |
| 2      | 15.610        | MM   | 0.4948      | 6812.89600  | 229.48106    | 99.1208 |

Totals : 6873.32833 233.36702

**Figure S51.** HPLC spectrum of **2a**

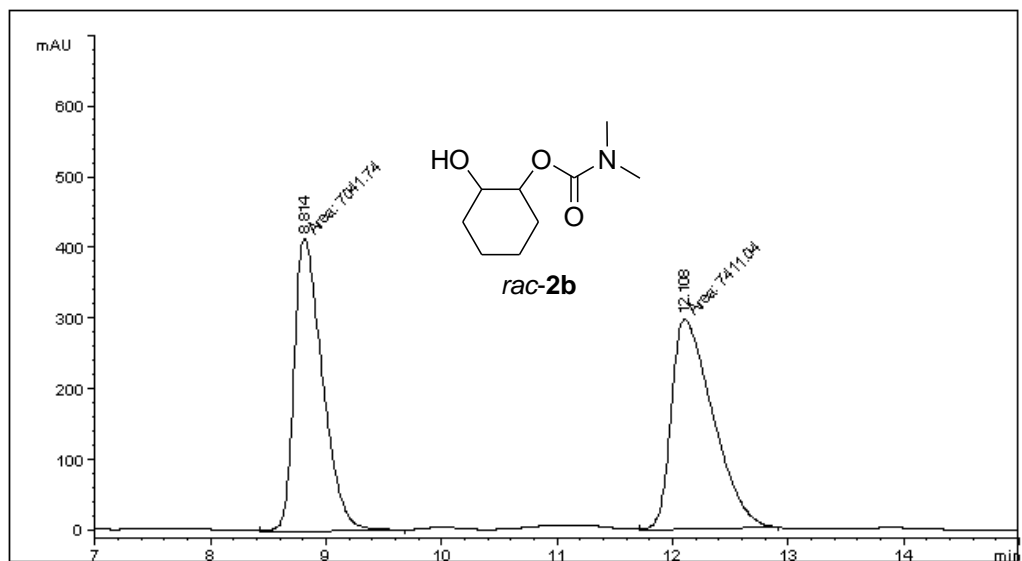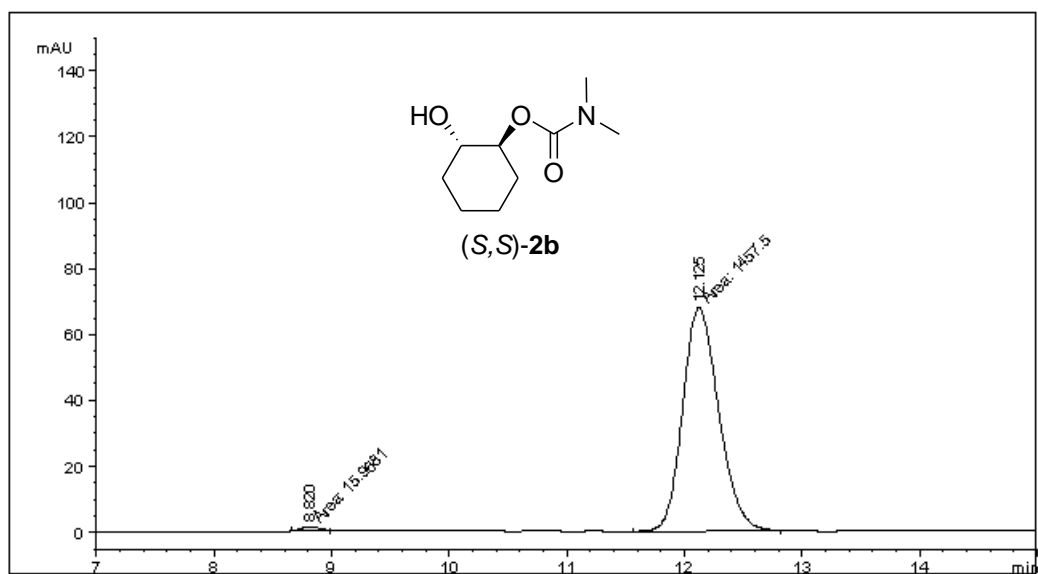

=====  
 Area Percent Report  
 =====

Sorted By : Signal  
 Multiplier : 1.0000  
 Dilution : 1.0000  
 Use Multiplier & Dilution Factor with ISTDs

Signal 1: VWD1 A, Wavelength=210 nm

| Peak # | RetTime [min] | Type | Width [min] | Area mAU *s | Height [mAU] | Area %  |
|--------|---------------|------|-------------|-------------|--------------|---------|
| 1      | 8.820         | MM   | 0.1878      | 15.96810    | 1.41725      | 1.0837  |
| 2      | 12.125        | MM   | 0.3570      | 1457.50232  | 68.04016     | 98.9163 |

Totals : 1473.47042 69.45741

**Figure S52.** HPLC spectrum of **2b**

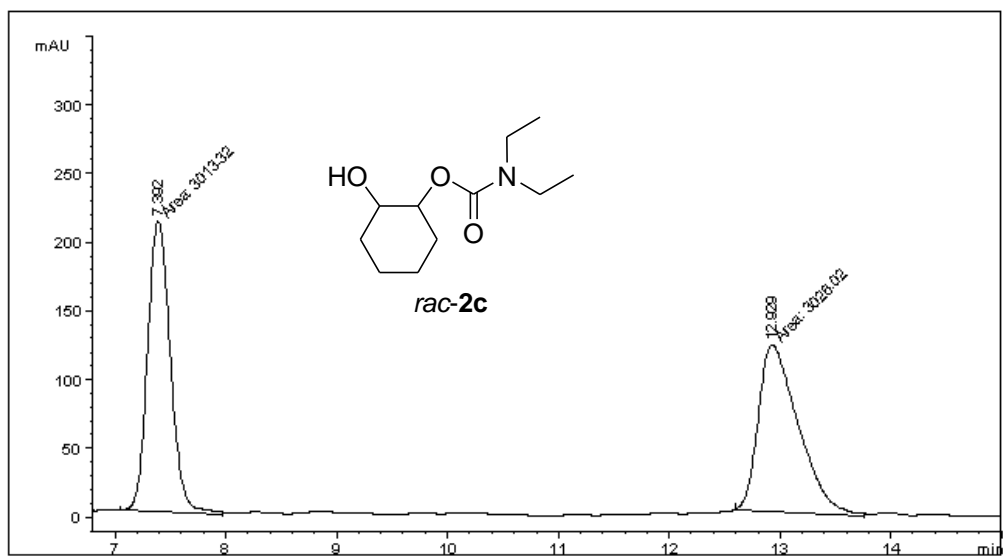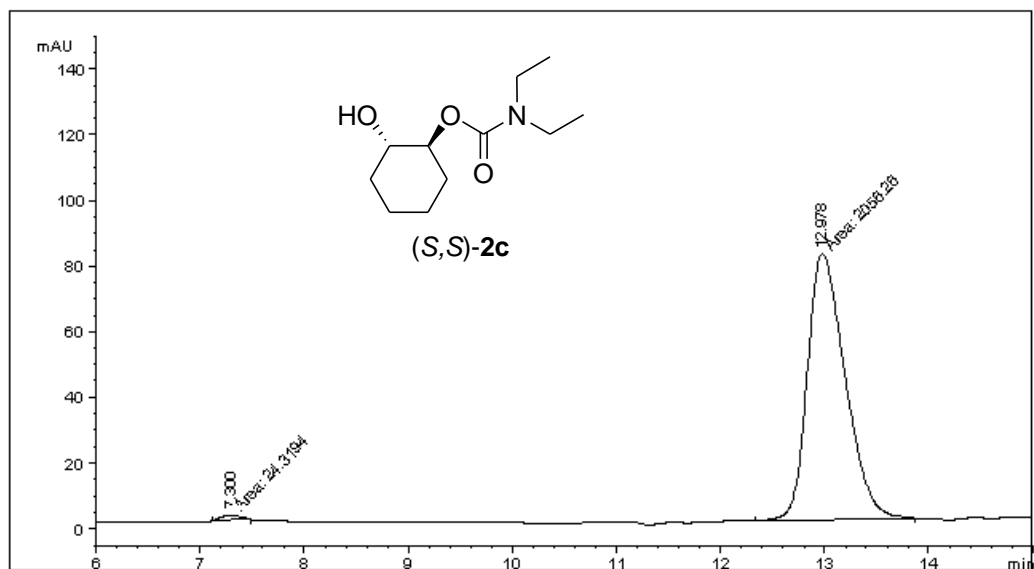

=====  
 Area Percent Report  
 =====

Sorted By : Signal  
 Multiplier : 1.0000  
 Dilution : 1.0000  
 Use Multiplier & Dilution Factor with ISTDs

Signal 1: VWD1 A, Wavelength=210 nm

| Peak # | RetTime [min] | Type | Width [min] | Area mAU   | Area %s | Height [mAU] | Area %  |
|--------|---------------|------|-------------|------------|---------|--------------|---------|
| 1      | 7.300         | MM   | 0.1184      | 24.31938   |         | 3.42200      | 1.1689  |
| 2      | 12.978        | MM   | 0.4222      | 2056.25537 |         | 81.18111     | 98.8311 |

Totals : 2080.57475 84.60311

**Figure S53.** HPLC spectrum of **2c**

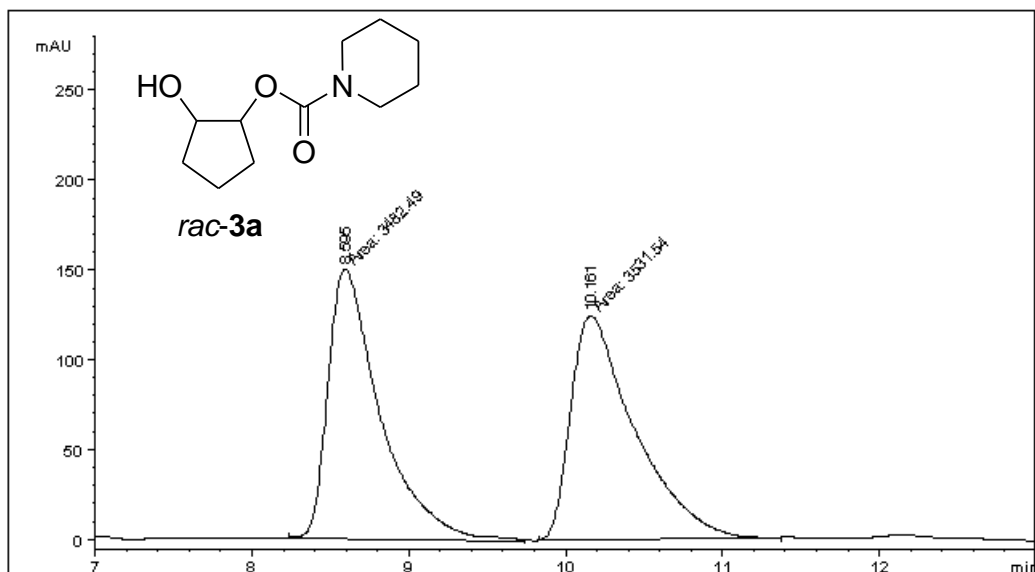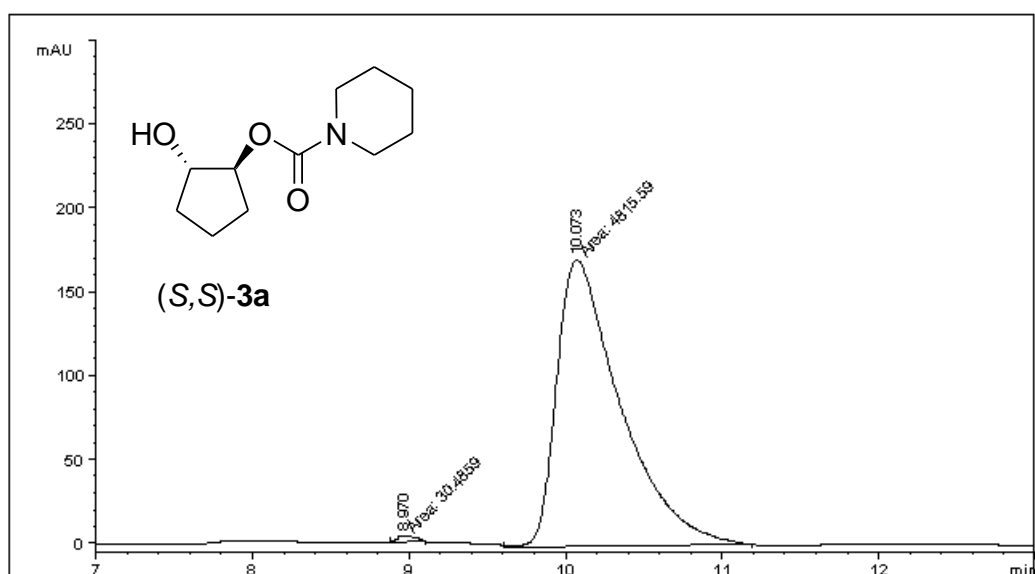

=====  
 Area Percent Report  
 =====

Sorted By : Signal  
 Multiplier : 1.0000  
 Dilution : 1.0000  
 Use Multiplier & Dilution Factor with ISTDs

Signal 1: VWD1 A, Wavelength=210 nm

| Peak # | RetTime [min] | Type | Width [min] | Area mAU   | Area *s   | Height [mAU] | Area % |
|--------|---------------|------|-------------|------------|-----------|--------------|--------|
| 1      | 8.970         | MM   | 0.1476      | 30.48592   | 3.44282   | 0.6291       |        |
| 2      | 10.073        | MM   | 0.4702      | 4815.59180 | 170.69839 | 99.3709      |        |

Totals : 4846.07771 174.14121

**Figure S54.** HPLC spectrum of **3a**

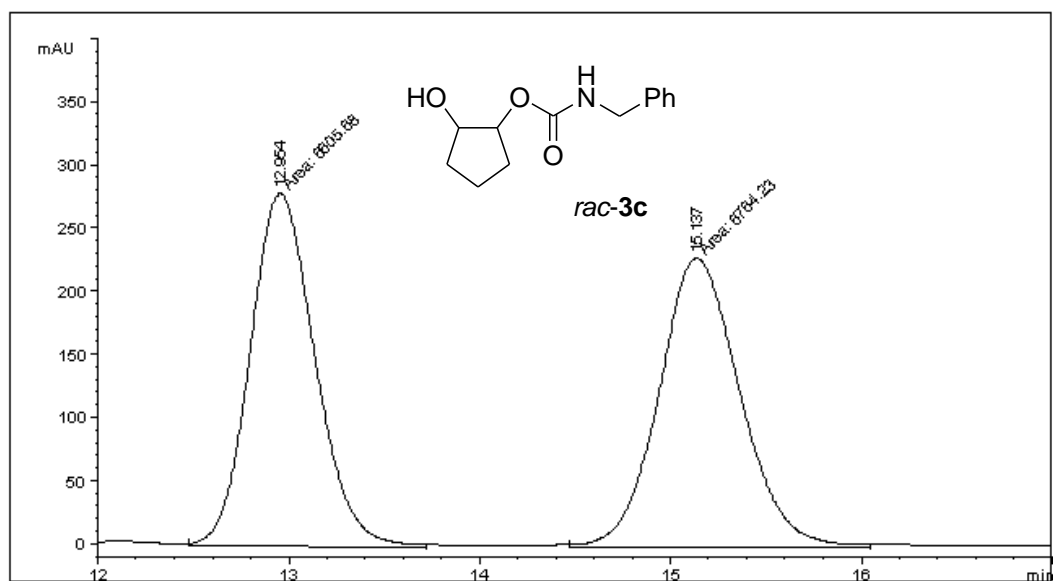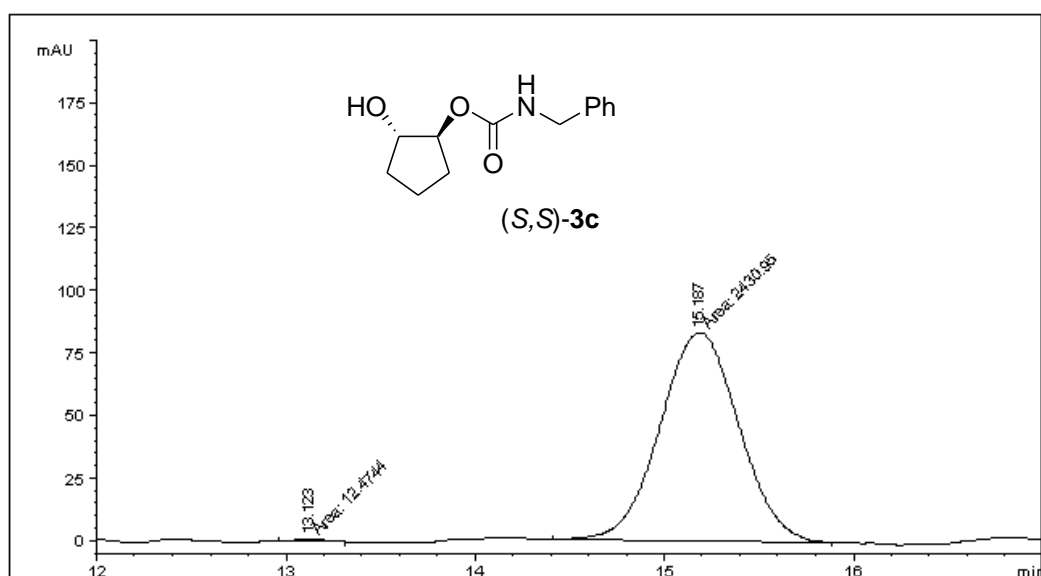

=====  
 Area Percent Report  
 =====

Sorted By : Signal  
 Multiplier : 1.0000  
 Dilution : 1.0000  
 Use Multiplier & Dilution Factor with ISTDs

Signal 1: VWD1 A, Wavelength=210 nm

| Peak # | RetTime [min] | Type | Width [min] | Area mAU   | Area *s | Height [mAU] | Area %  |
|--------|---------------|------|-------------|------------|---------|--------------|---------|
| 1      | 13.123        | MM   | 0.1860      | 12.47439   |         | 1.11766      | 0.5105  |
| 2      | 15.187        | MM   | 0.4855      | 2430.95068 |         | 83.44405     | 99.4895 |

Totals : 2443.42507 84.56171

**Figure S55.** HPLC spectrum of 3c

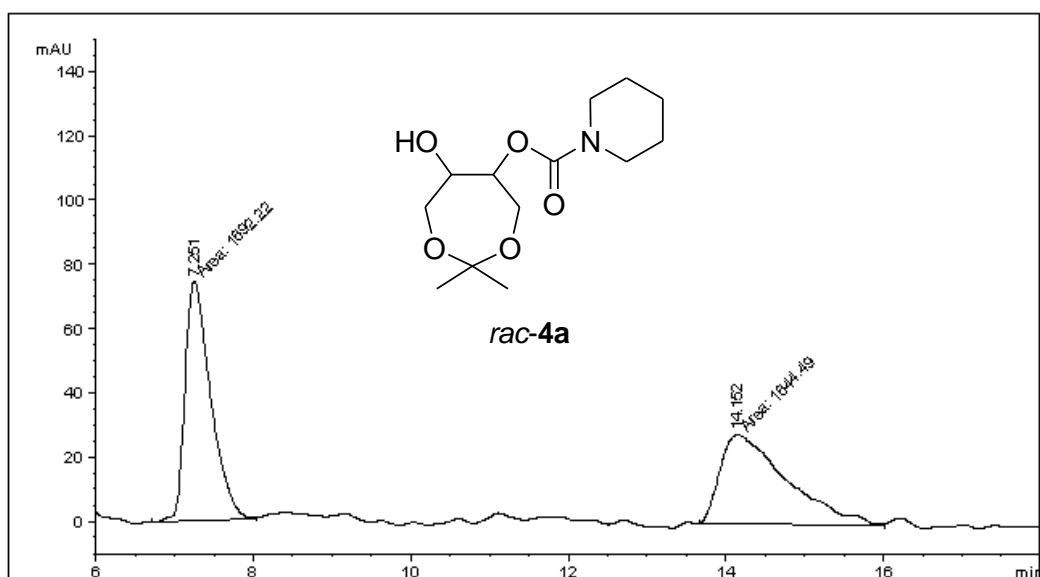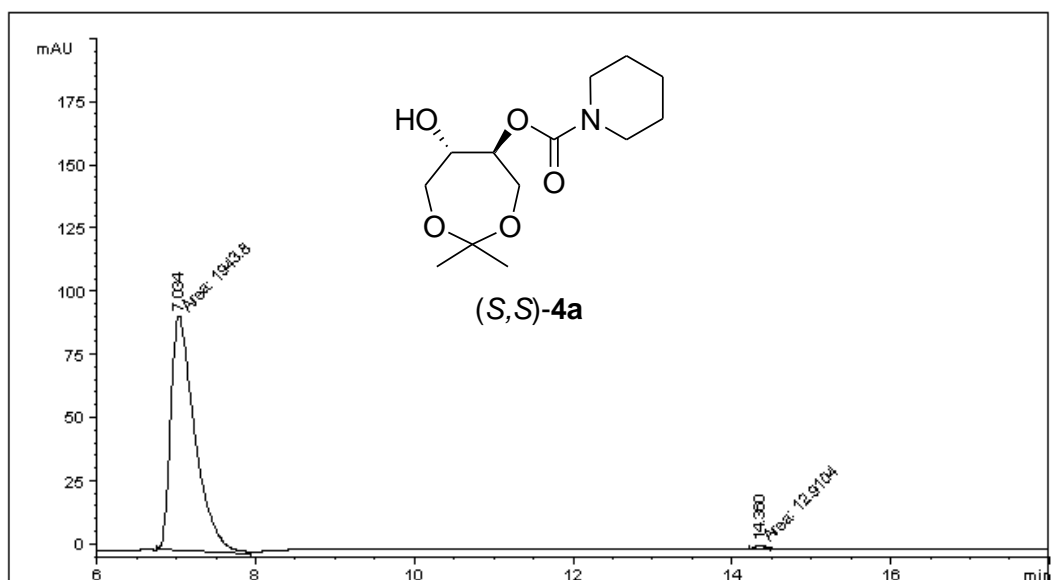

=====  
 Area Percent Report  
 =====

Sorted By : Signal  
 Multiplier : 1.0000  
 Dilution : 1.0000  
 Use Multiplier & Dilution Factor with ISTDs

Signal 1: VWD1 A, Wavelength=210 nm

| Peak # | RetTime [min] | Type | Width [min] | Area mAU   | Height [mAU] | Area %  |
|--------|---------------|------|-------------|------------|--------------|---------|
| 1      | 7.034         | MM   | 0.3502      | 1943.80432 | 92.51027     | 99.3402 |
| 2      | 14.360        | MM   | 0.1739      | 12.91043   | 1.23733      | 0.6598  |

Totals : 1956.71475 93.74760

**Figure S56.** HPLC spectrum of 4a

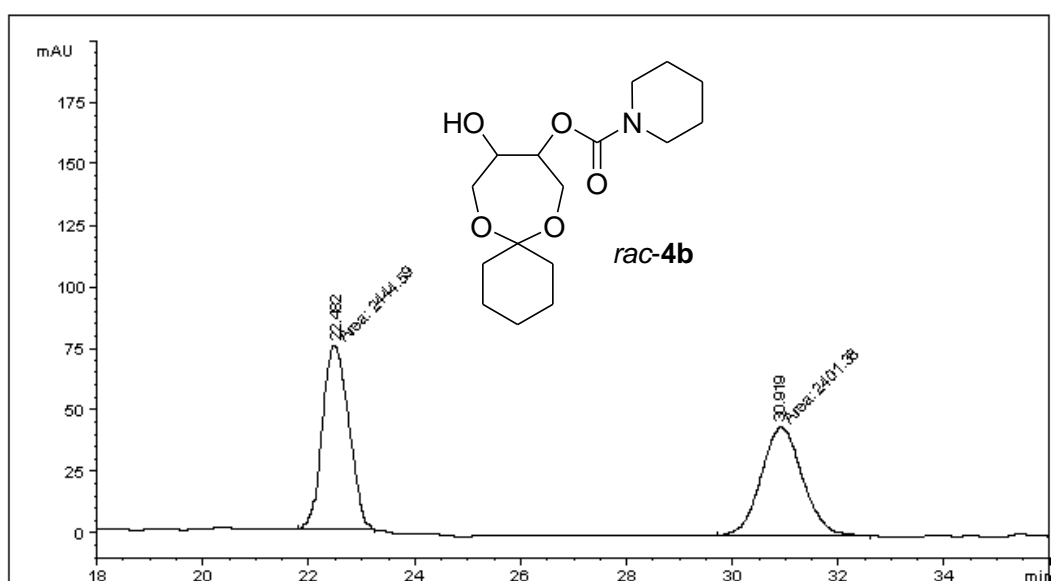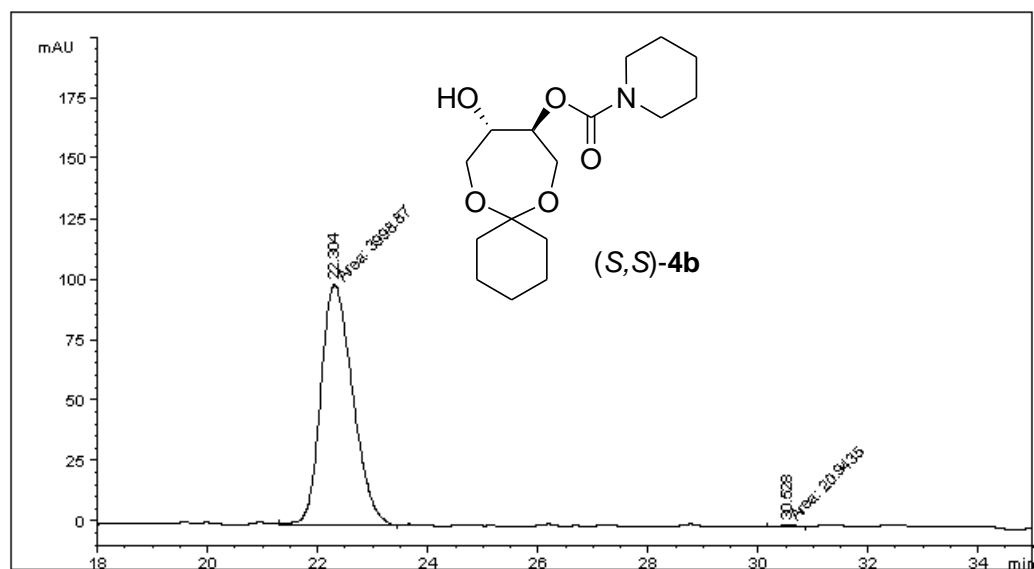

=====  
 Area Percent Report  
 =====

Sorted By : Signal  
 Multiplier : 1.0000  
 Dilution : 1.0000  
 Use Multiplier & Dilution Factor with ISTDs

Signal 1: VWD1 A, Wavelength=210 nm

| Peak # | RetTime [min] | Type | Width [min] | Area mAU   | Area %  | Height [mAU] |
|--------|---------------|------|-------------|------------|---------|--------------|
| 1      | 22.304        | MM   | 0.6699      | 3998.87476 | 99.4790 | 99.48444     |
| 2      | 30.528        | MM   | 0.3338      | 20.94353   | 0.5210  | 1.04560      |

Totals : 4019.81828 100.53004

**Figure S57. HPLC spectrum of 4b**

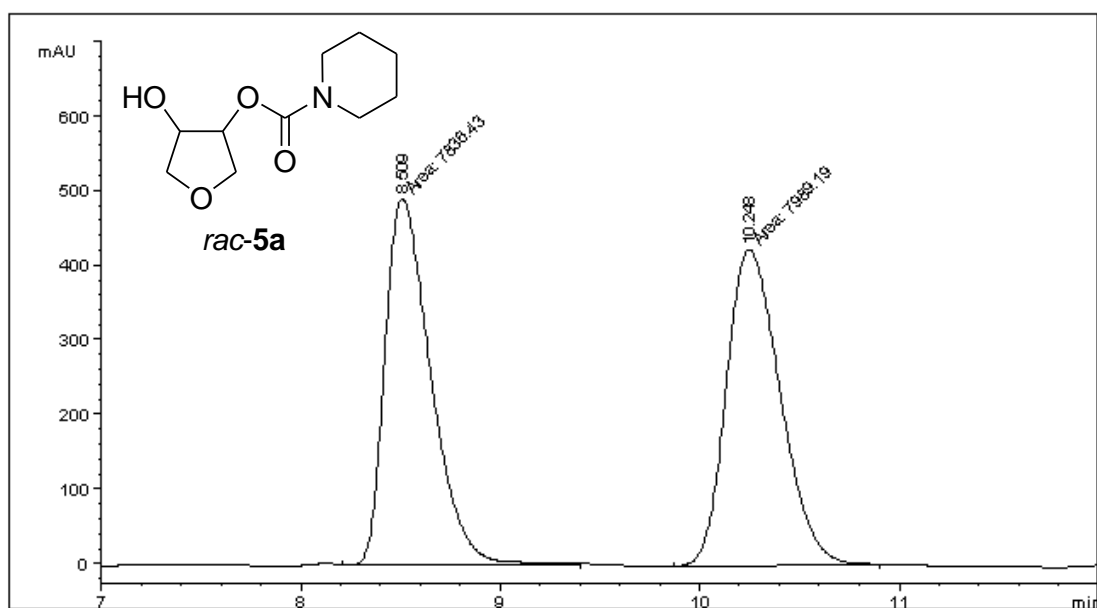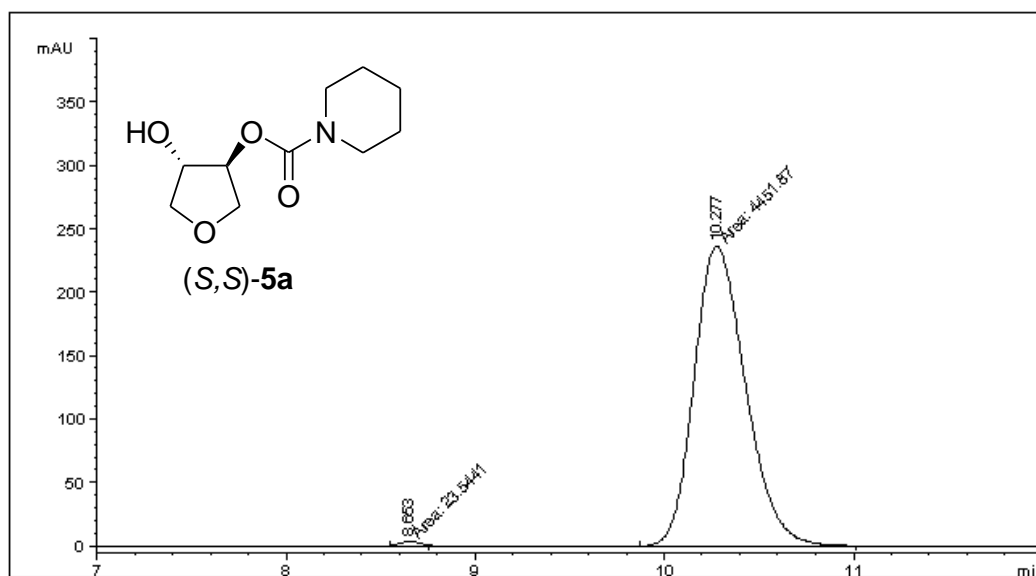

=====  
 Area Percent Report  
 =====

Sorted By : Signal  
 Multiplier : 1.0000  
 Dilution : 1.0000  
 Use Multiplier & Dilution Factor with ISTDs

Signal 1: VWD1 A, Wavelength=210 nm

| Peak # | RetTime [min] | Type | Width [min] | Area mAU   | Area %  | Height [mAU] |
|--------|---------------|------|-------------|------------|---------|--------------|
| 1      | 8.653         | MM   | 0.1294      | 23.54413   | 0.5261  | 3.03139      |
| 2      | 10.277        | MM   | 0.3147      | 4451.87256 | 99.4739 | 235.73959    |

Totals : 4475.41669 238.77099

**Figure S58.** HPLC spectrum of **5a**



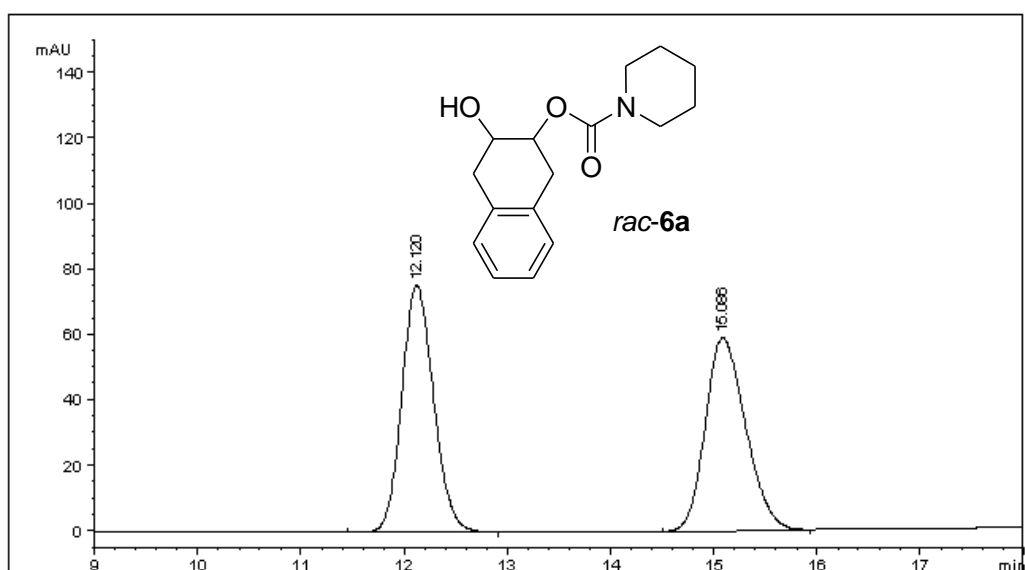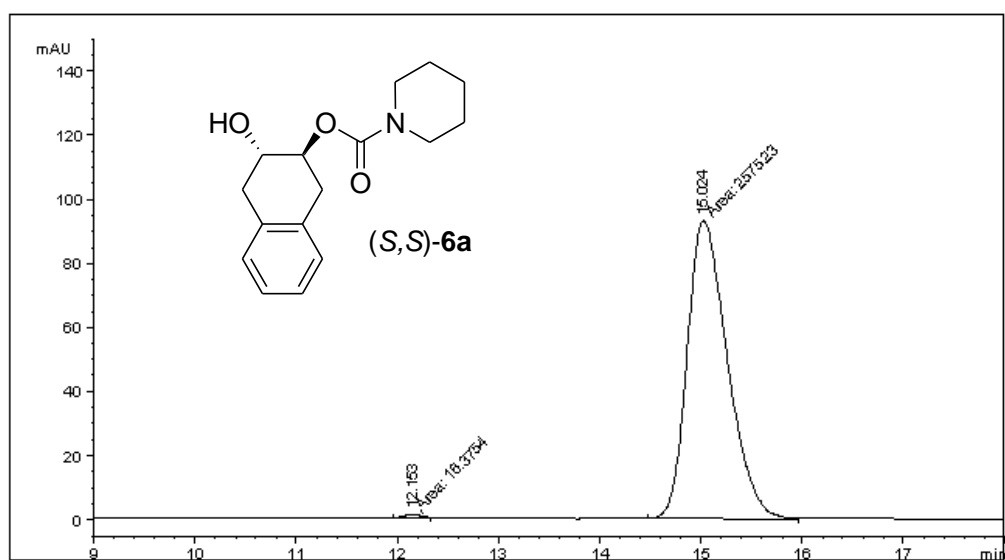

=====  
Area Percent Report  
=====

Sorted By : Signal  
Multiplier : 1.0000  
Dilution : 1.0000  
Use Multiplier & Dilution Factor with ISTDs

Signal 1: VWD1 A, Wavelength=254 nm

| Peak # | RetTime [min] | Type | Width [min] | Area mAU   | Area *s | Height [mAU] | Area %  |
|--------|---------------|------|-------------|------------|---------|--------------|---------|
| 1      | 12.153        | MM   | 0.2192      | 16.37545   |         | 1.24499      | 0.6319  |
| 2      | 15.024        | MM   | 0.4614      | 2575.22681 |         | 93.03033     | 99.3681 |

Totals : 2591.60225 94.27532

**Figure S59.** HPLC spectrum of **6a**

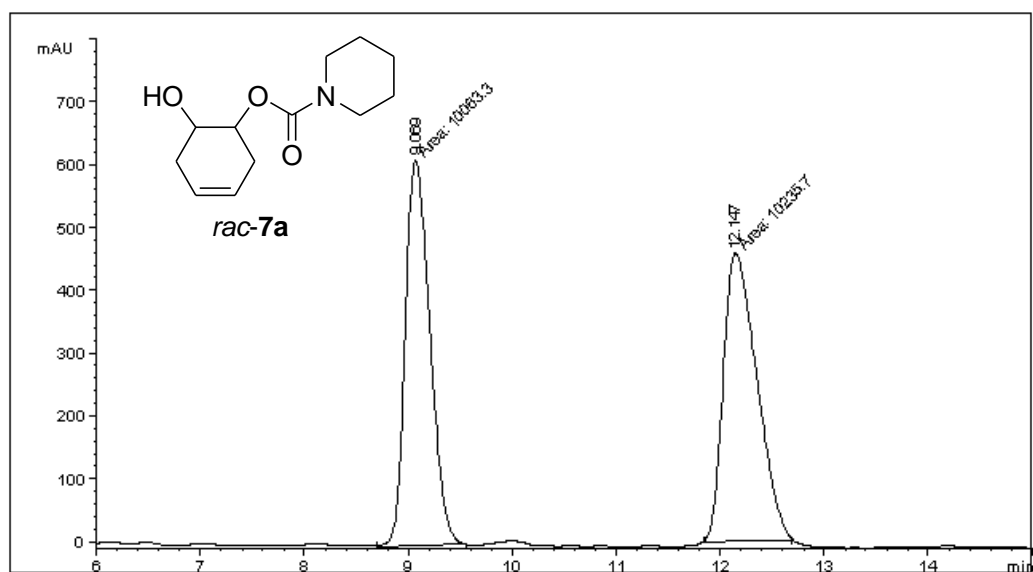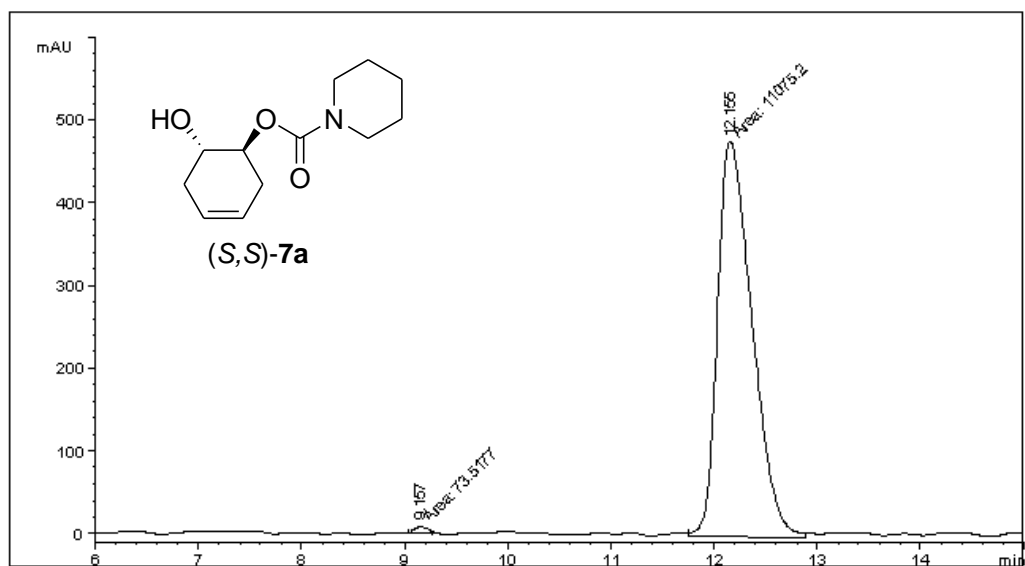

=====  
 Area Percent Report  
 =====

Sorted By : Signal  
 Multiplier : 1.0000  
 Dilution : 1.0000  
 Use Multiplier & Dilution Factor with ISTDs

Signal 1: VWD1 A, Wavelength=210 nm

| Peak # | RetTime [min] | Type | Width [min] | Area mAU *s | Height [mAU] | Area %  |
|--------|---------------|------|-------------|-------------|--------------|---------|
| 1      | 9.157         | MM   | 0.1357      | 73.51771    | 9.02688      | 0.6594  |
| 2      | 12.155        | MM   | 0.3866      | 1.10752e4   | 477.42279    | 99.3406 |

Totals : 1.11487e4 486.44967

**Figure S60.** HPLC spectrum of **7a**

#### 4. Mechanistic understanding of ammonolysis reaction

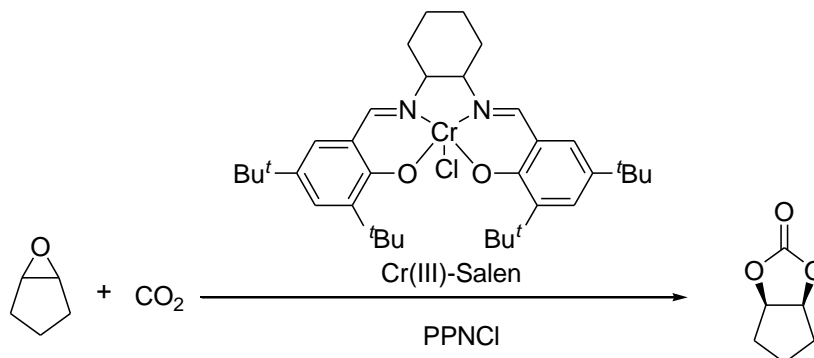

**Scheme S1.** Synthesis of *cis*-carbamates from CO<sub>2</sub>/cyclopentene oxide

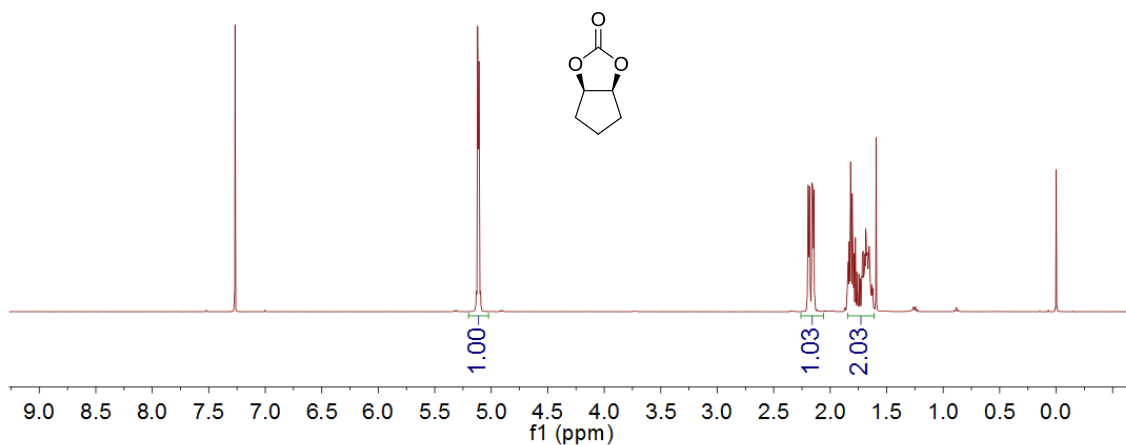

**Figure S61.** <sup>1</sup>H NMR spectrum of *cis*-cyclopentene carbonate

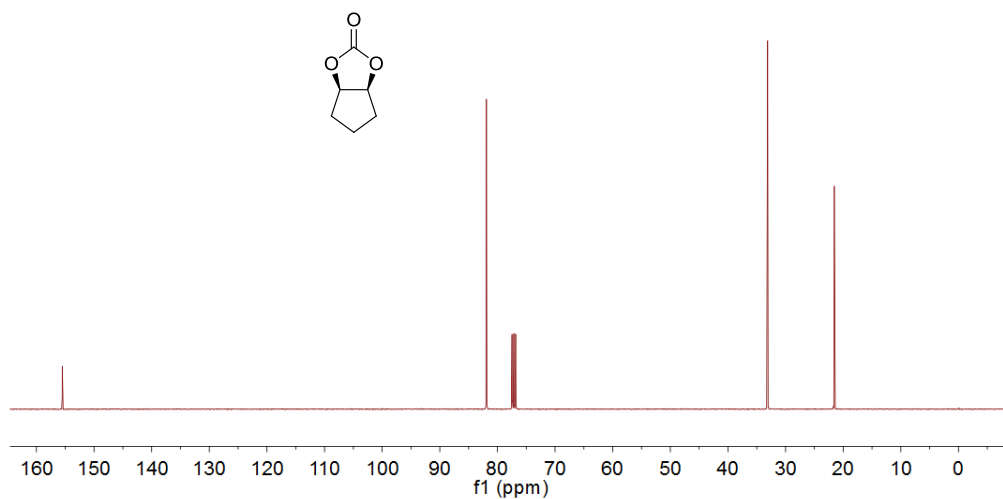

**Figure S62.** <sup>13</sup>C NMR spectrum of *cis*-cyclopentene carbonate

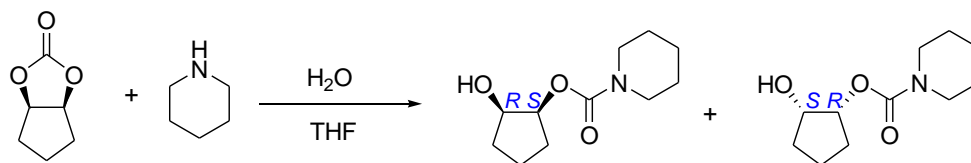

**Scheme S2.** Synthesis of *cis*-carbamates from aminolysis of carbonates

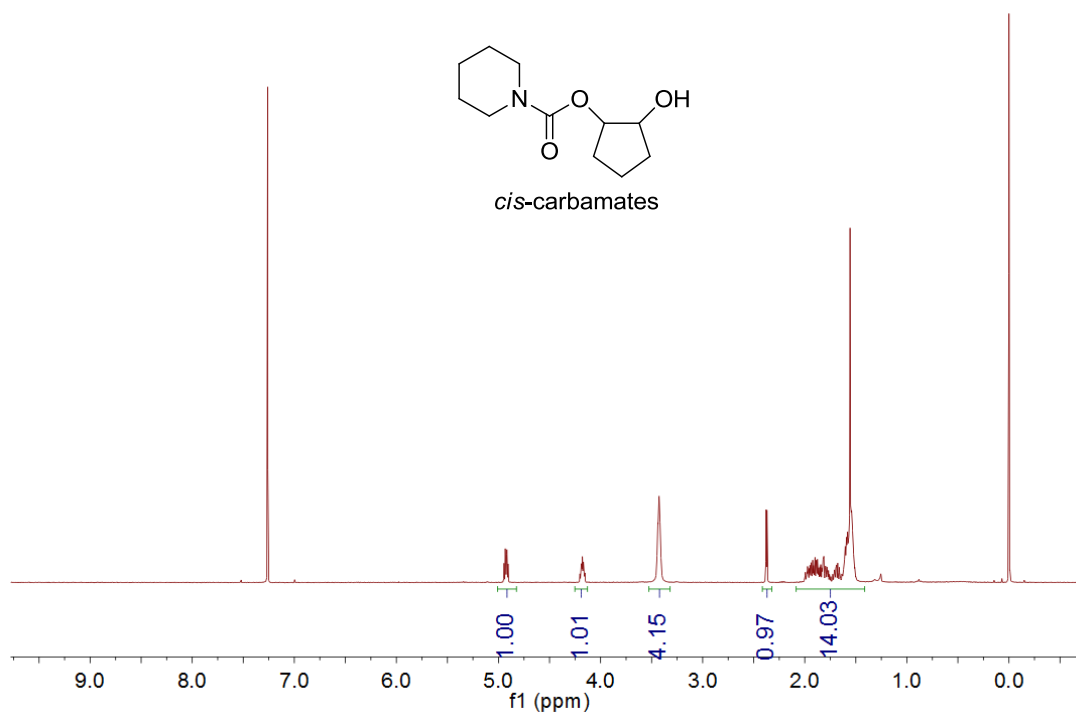

**Figure S63.**  $^1\text{H}$  NMR spectrum of *cis*-carbamates.

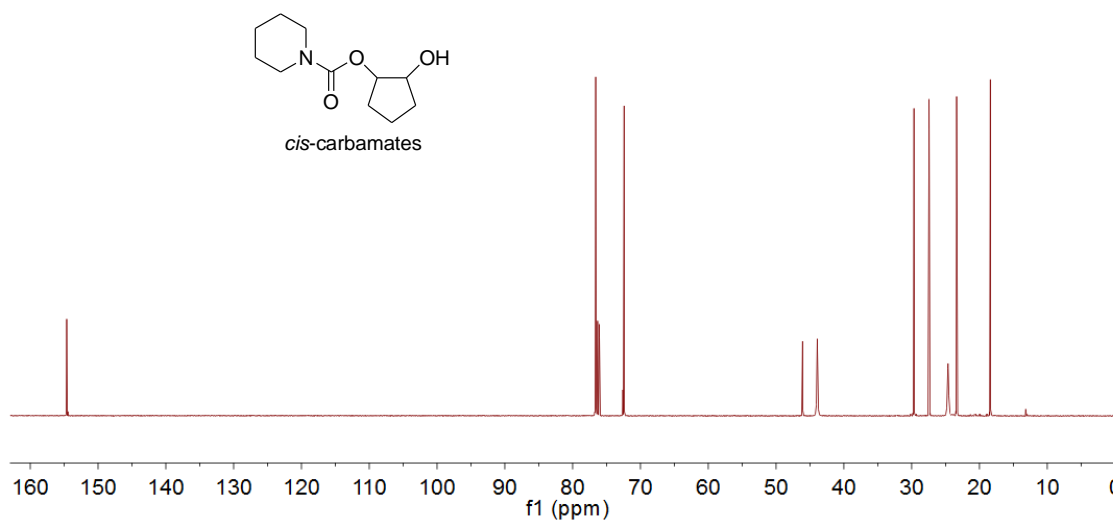

**Figure S64.**  $^{13}\text{C}$  NMR spectrum of *cis*-carbamates.

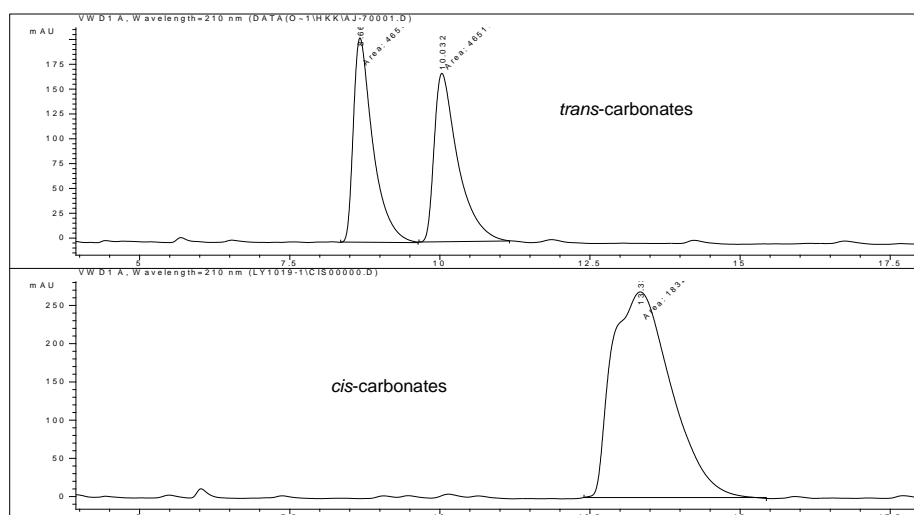

**Figure S65.** HPLC spectrum of *cis*-carbamate and *trans*-carbamate (HPLC conditons: Chiralpak AS-H, hexane/*i*PrOH = 95/5, flow rate = 1.0 mL/min, maximum absorption wavelength  $\lambda$  = 210 nm).

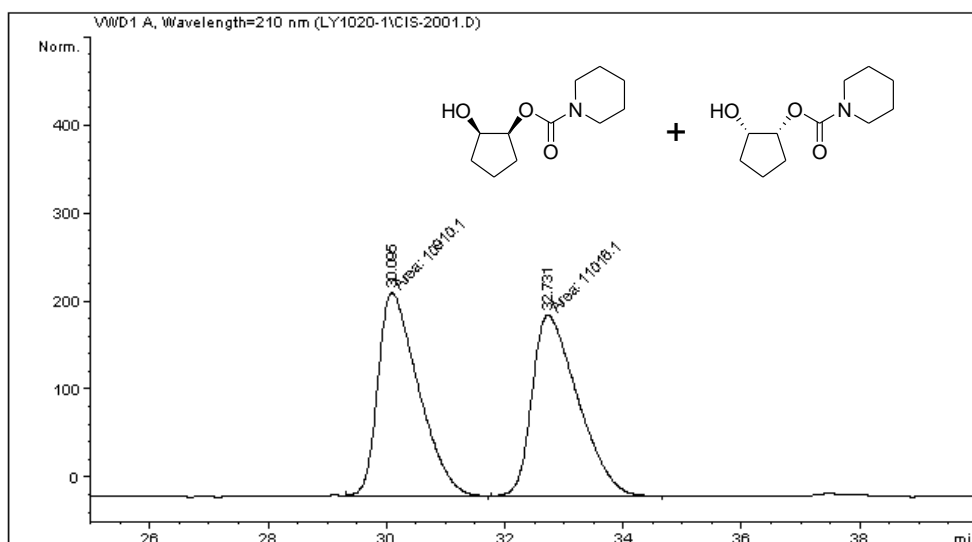

```

=====
                        Area Percent Report
=====
Sorted By      :      Signal
Multiplier     :      1.0000
Dilution       :      1.0000
Use Multiplier & Dilution Factor with ISTDs

Signal 1: VWD1 A, Wavelength=210 nm

Peak RetTime Type Width Area Height Area
# [min] [min] [min] mAU *s [mAU ] %
-----|-----|-----|-----|-----|
1 30.095 MM 0.7886 1.09101e4 230.58556 49.7583
2 32.731 MM 0.8968 1.10161e4 204.73941 50.2417

Totals :                      2.19261e4 435.32497

Results obtained with enhanced integrator!
=====
*** End of Report ***

```

**Figure S66.** HPLC spectrum of *cis*-carbamate. HPLC conditons: Chiralpak AD-H, hexane/*i*PrOH = 98/2, flow rate = 0.8 mL/min, maximum absorption wavelength  $\lambda$  = 210 nm.

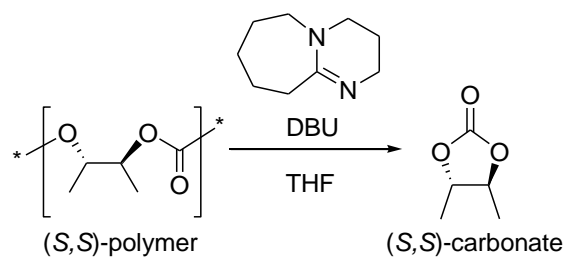

**Scheme S3.** Synthesis of *trans*-2-butene carbonate

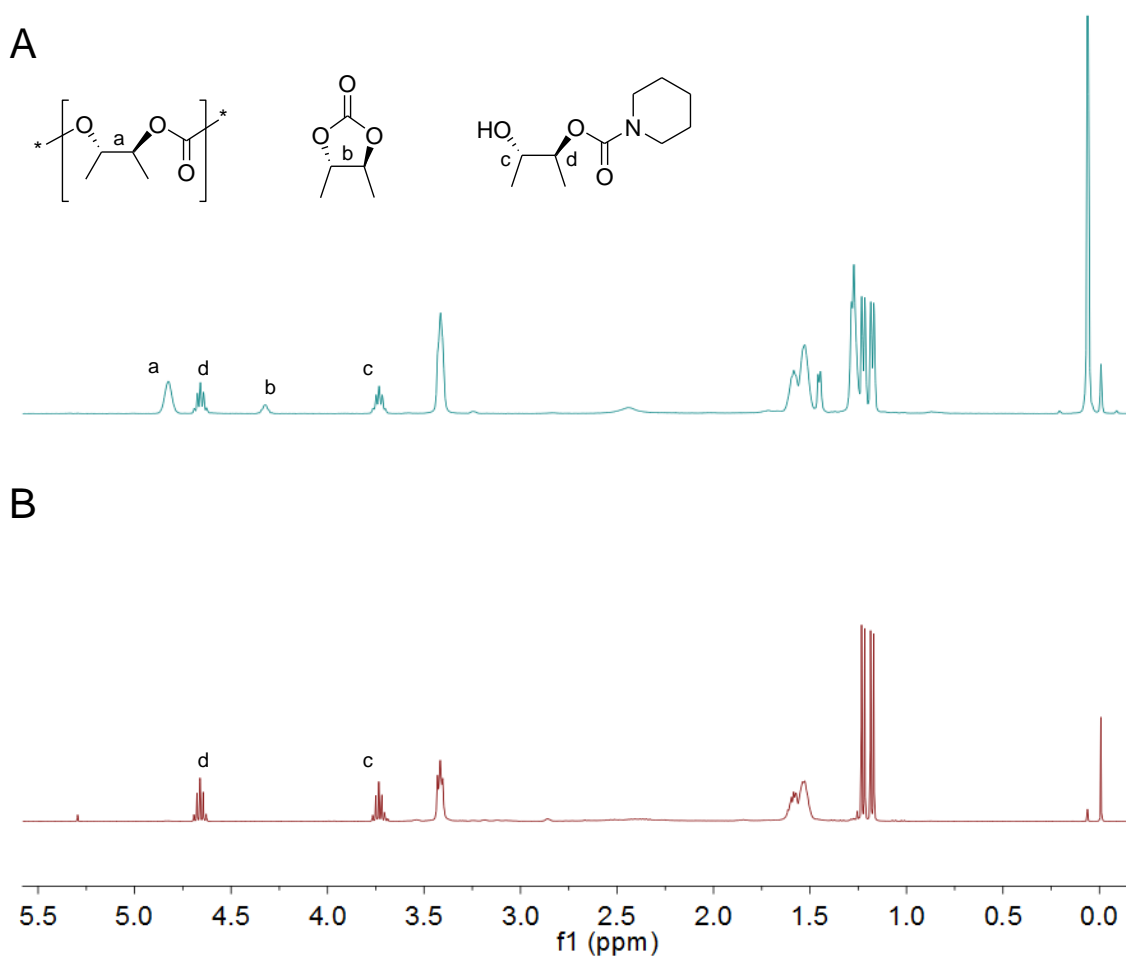

**Figure S67.**  $^1\text{H}$  NMR spectrum of the reaction mixture of poly(*trans*-2-butene carbonate) with piperidine in  $\text{CDCl}_3$ . A) the reaction was carried out in absence of water; B) the reaction was carried out in presence of water. (Reaction condition:  $\text{CO}_2$  polymers (464 mg, 4 mmol), amine (4 mmol, 1 equiv to per carbonate unit), water (4 mmol, 1 equiv to per carbonate unit) were dissolved in 10 mL THF at room temperature. The reaction mixture was stirred at 60  $^\circ\text{C}$  for 1 h. A small amount of mixture was removed for  $^1\text{H}$  NMR analysis after the removal of the solvent under reduced pressure

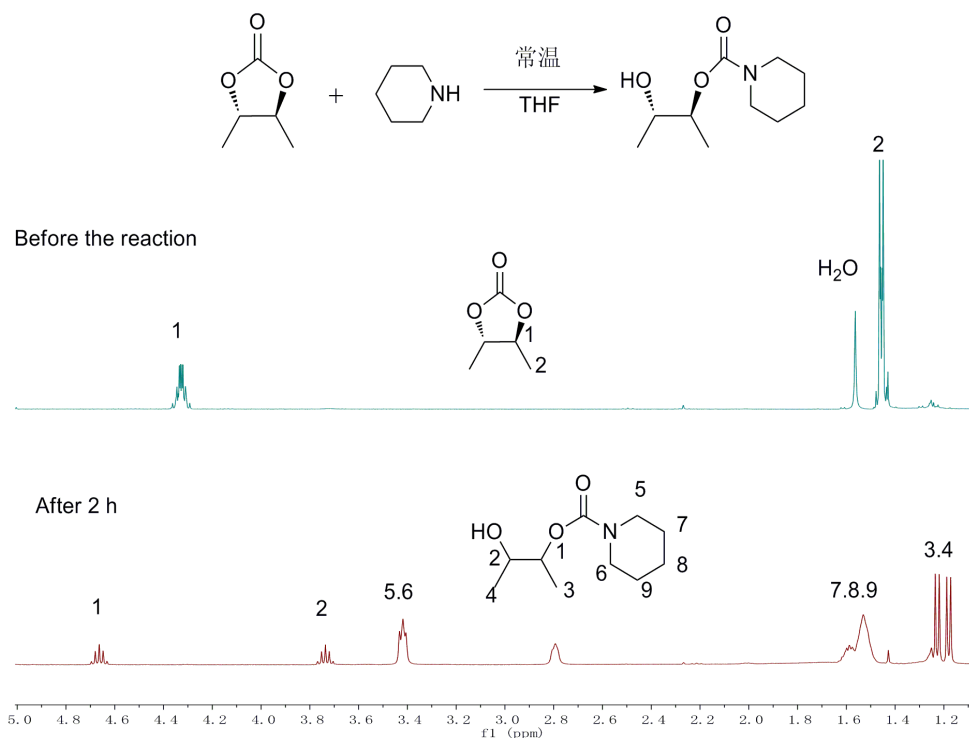

**Figure S68.**  $^1\text{H}$  NMR spectrum of the reaction of *trans*-2-butene carbonate with piperidine in  $\text{CDCl}_3$ . Reaction condition: *trans*-2-butene carbonate (0.2 mmol), piperidine (0.2 mmol, 1 equiv to per carbonate unit) and water (0.2 mmol, 1 equiv to per carbonate unit) were dissolved in 5 mL THF. The reaction mixture was stirred for 2 h at room temperature. A small amount of mixture was removed for  $^1\text{H}$  NMR analysis after the removal of the solvent under reduced pressure

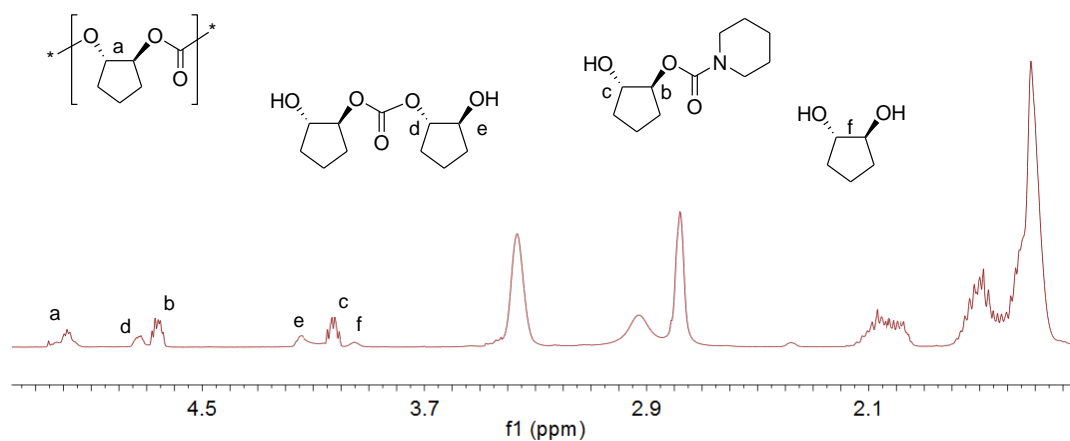

**Figure S69.**  $^1\text{H}$  NMR spectrum of the reaction mixture of poly(cyclopentene carbonate) with piperidine in  $\text{CDCl}_3$ . Reaction condition:  $\text{CO}_2$  polymers (512 mg, 4.0 mmol), amine (20 mmol, 5 equiv to per carbonate unit), water (20 mmol, 5 equiv to per carbonate unit) were dissolved in 10 mL THF at room temperature. The reaction mixture was stirred at  $60^\circ\text{C}$  for 24 h. A small amount of mixture was removed for  $^1\text{H}$  NMR analysis after the removal of the solvent under reduced pressure

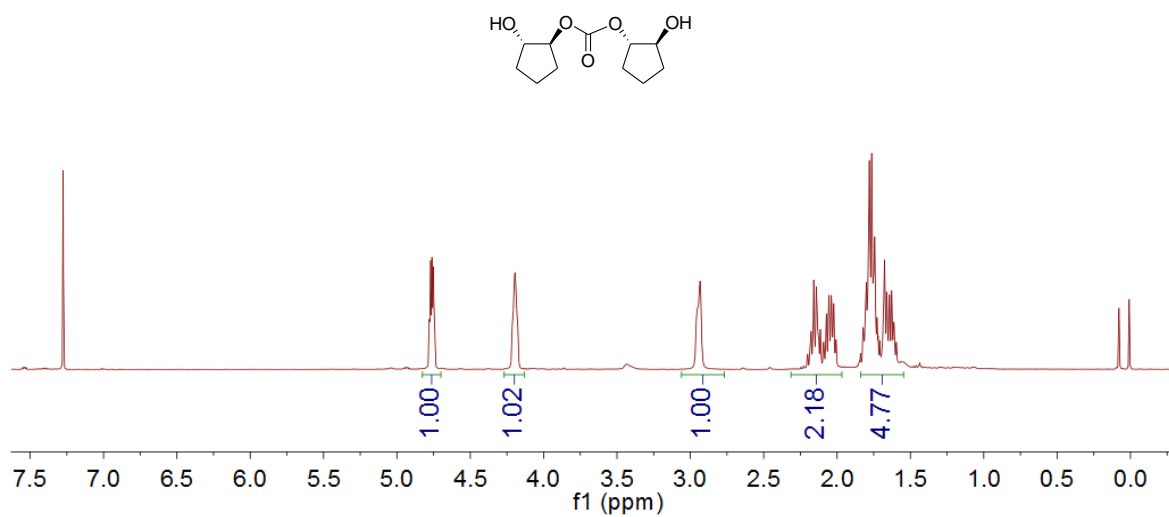

**Figure S70.** <sup>1</sup>H NMR spectrum of 2,2'-carbonyldioxydicyclopentanol.

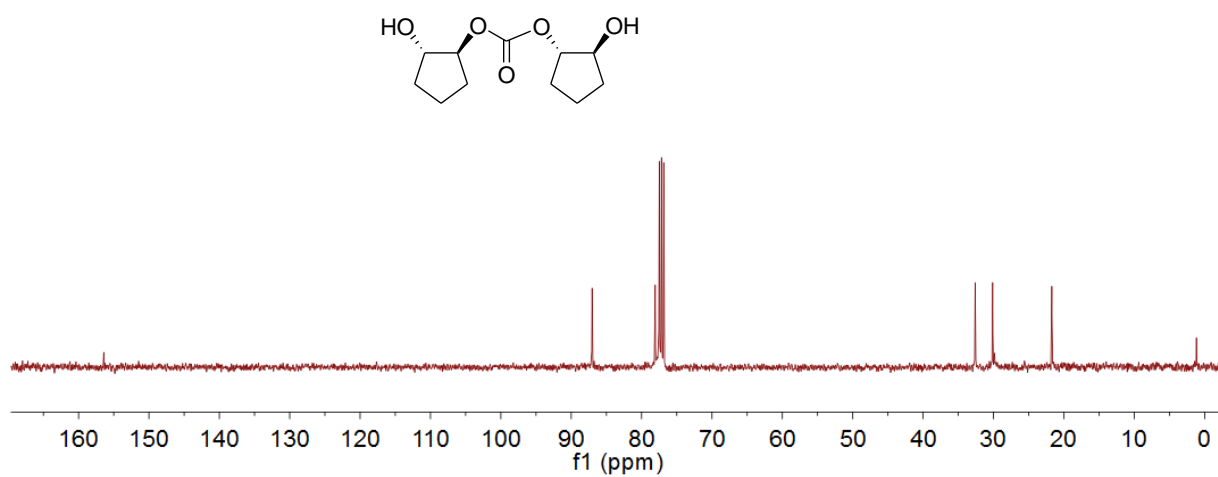

**Figure S71.** <sup>13</sup>C NMR spectrum of 2,2'-carbonyldioxydicyclopentanol.



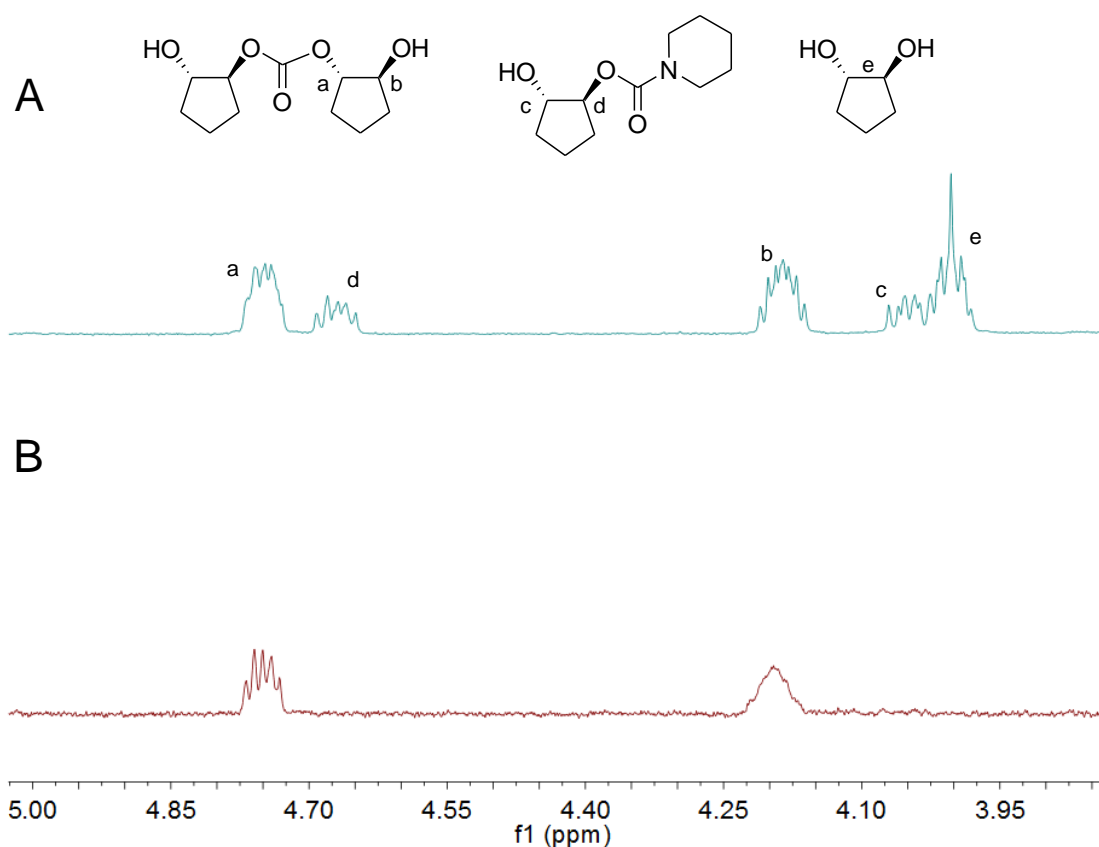

**Figure S72.** The aminolysis reaction of 2,2'-carbonyldioxydicyclopentanol with piperidine in presence (top, plot-A) and absence (bottom, plot-B) of water. Reaction condition: 2,2'-carbonyldioxydicyclohexanol (0.2 mmol), piperidine (0.2 mmol) and water (0.2 mmol) were dissolved in 5 mL THF at room temperature. The reaction mixture was stirred at room temperature for 24 h. A small amount of mixture was removed for  $^1\text{H}$  NMR analysis after the removal of the solvent under reduced pressure

## 5. NMR spectrum of (S,S)-carbamate derivative for X-Ray analysis

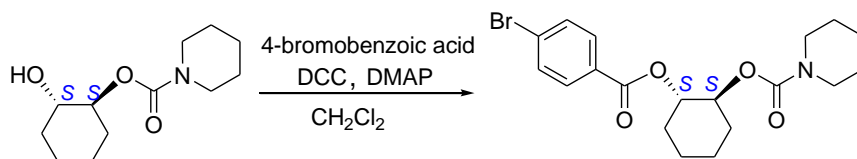

**Scheme S4.** Synthesis of (S,S)-carbamate derivative for X-Ray analysis

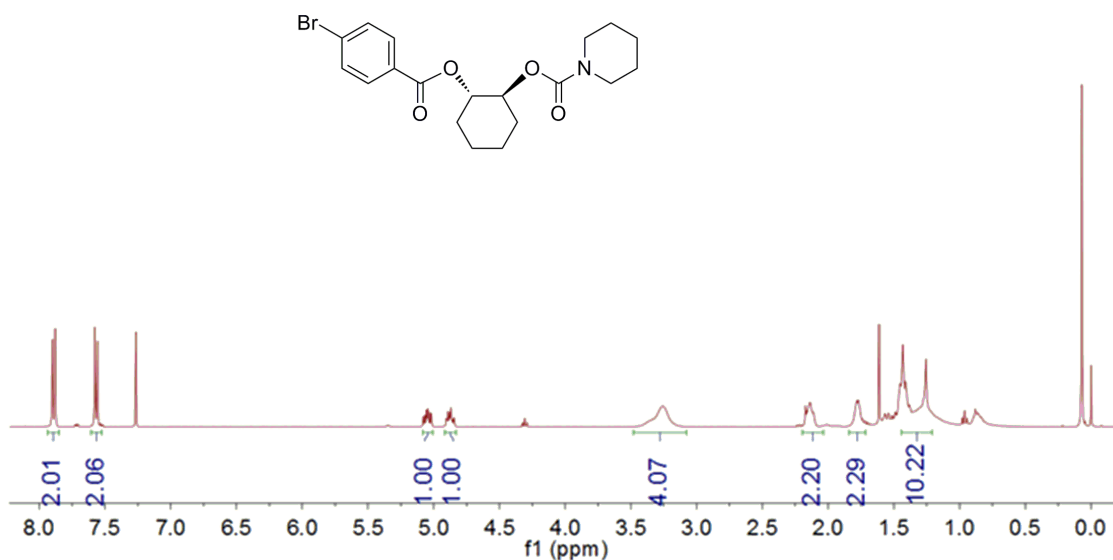

**Figure S73.** <sup>1</sup>H NMR spectrum of (S,S)-carbamate derivative for X-Ray analysis

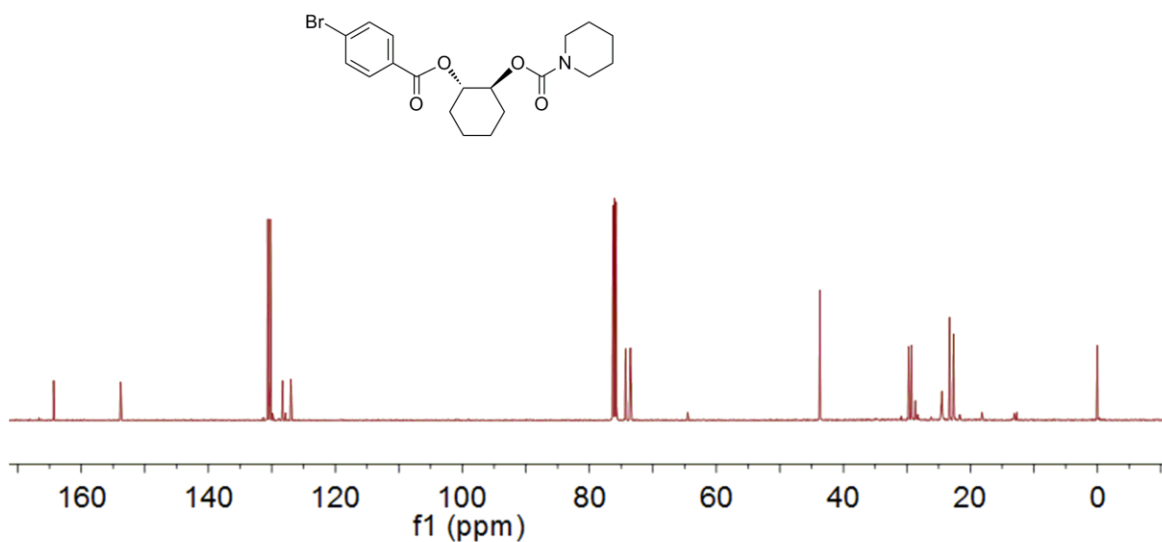

**Figure S74.** <sup>13</sup>C NMR spectrum of (S,S)-carbamate derivative for X-Ray analysis

## 6. Crystal structure determination

**Crystal structure determination.** The single crystal of (*S,S*)-carbamate derivative (CCDC: 1491321) suitable for X-ray structural analysis was obtained from a hexane at -7 °C. Diffraction data were collected at 200 K on a CCD diffractometer using graphite-monochromated Mo K $\alpha$  radiation ( $\lambda = 0.71073$  Å). The structures were solved by direct methods and refined by full-matrix least squares on  $F^2$ . All nonhydrogen atoms were refined anisotropically, and the hydrogen atoms were included in idealized positions. All calculations were performed using the SHELXTL crystallographic software packages. The data can be obtained free of charge from The Cambridge Crystallographic Data Centre via [www.ccdc.cam.ac.uk/data\\_request/cif](http://www.ccdc.cam.ac.uk/data_request/cif).

**Table S2.** Summary of crystal data and structural refinement details of carbamate derivative

|                                        | ( <i>S,S</i> )-carbamate derivative                                                 |
|----------------------------------------|-------------------------------------------------------------------------------------|
| structure                              | 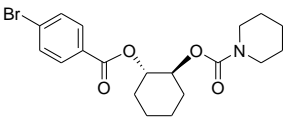 |
| mol formula                            | C <sub>19</sub> H <sub>24</sub> Br N O <sub>4</sub>                                 |
| mol wt                                 | 410.30                                                                              |
| cryst syst                             | Orthorhombic                                                                        |
| space group                            | P2(1)2(1)2(1)                                                                       |
| <i>a</i> /Å                            | 9.586(4)                                                                            |
| <i>b</i> /Å                            | 10.266(4)                                                                           |
| <i>c</i> /Å                            | 19.842(8)                                                                           |
| $\alpha$ /deg                          | 90.00                                                                               |
| $\beta$ /deg                           | 90.00                                                                               |
| $\gamma$ /deg                          | 90.00                                                                               |
| <i>V</i> /Å <sup>3</sup>               | 1952.8(14)                                                                          |
| <i>Z</i>                               | 4                                                                                   |
| abs coeff/mm <sup>-1</sup>             | 2.127                                                                               |
| <i>R</i> <sub>int</sub>                | 0.0496                                                                              |
| <i>R</i> 1 ( <i>I</i> > 2 $\sigma$ )   | 0.0438 (2616)                                                                       |
| w <i>R</i> 2 ( <i>I</i> > 2 $\sigma$ ) | 0.982                                                                               |
| GOF                                    | 1.007                                                                               |

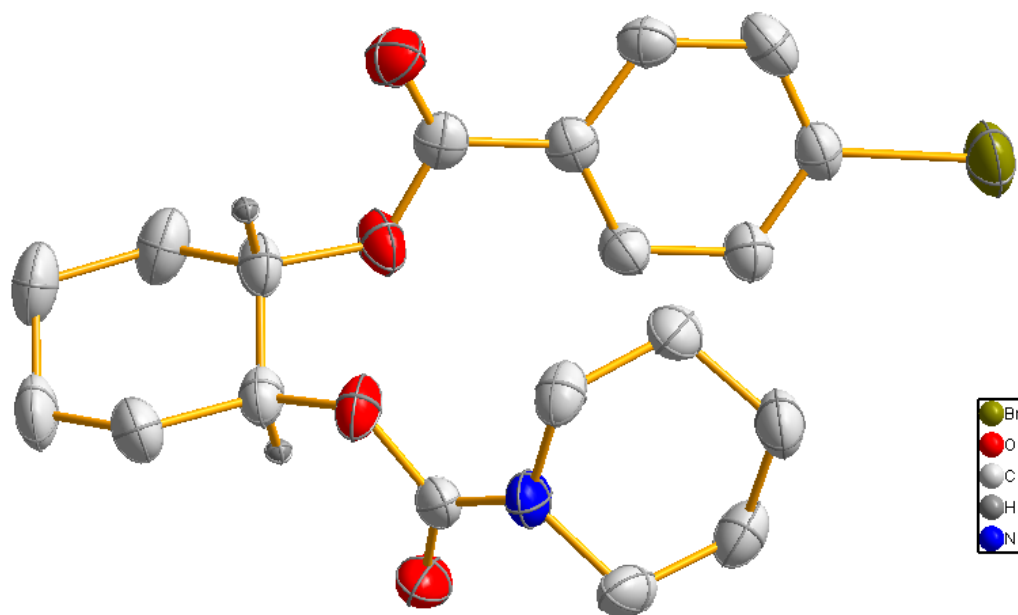

**Figure S75.** X-Ray molecular structures of (S,S)-carbamate derivative. Hydrogen atoms and uncoordinated solvent omitted for clarity, and thermal ellipsoids are at the 30% probability level.
